# Supplementary material for: Direct Inhibition of GSDMD by PEITC Reduces Hepatocyte Pyroptosis and Alleviates Acute Liver Injury in Mice
Source: Frontiers journal article supplement (doi:10.3389/fimmu.2022.825428), 2022-01-31
Supplement: Presentation_1.zip [file Figure 2A.xlsx]

## Sheet: ALT
Application: Tecan i-control				Tecan i-control , 1.10.4.0
Device: infinite 200Pro				Serial number: 1405000424				Serial number of connected stacker:
Firmware: V_3.37_07/12_Infinite (Jul 20 2012/13.56.47)				MAI, V_3.37_07/12_Infinite (Jul 20 2012/13.56.47)
System				WIN-TNLULF1QTDO
User				WIN-TNLULF1QTDO\Administrator
Plate				ThermoFischer Scientific-Nunclon 96 Flat Bottom Black Polystyrol Catalog No.: 137101/137103/237105/237107/237108/437111/437112 [NUN96fb.pdfx]
Plate-ID (Stacker)
Label: Label1
Mode				Absorbance
Wavelength				510	nm
Bandwidth				9	nm
Settle Time				0	ms
ALT standard curve	0	1	2	3	4	5
	0.2354	0.3022	0.3632	0.4034	0.4433	0.4837
ΔOD	0	0.0668	0.1278	0.168	0.2079	0.2483
enzyme activity	0	28	57	97	150	200
	treatment group
	1	2	3	4	5	control group
Normal	0.2746	0.2869	0.311	0.2988	0.2852	0.2436	0.2469	0.2618	0.25099	0.2518
Model（ConA 10 mg/kg）		0.6122	0.3686			0.2585	0.2536
peitc(pre)（7.5 mg/kg）		0.3862	0.51754			0.2528	0.253
peitc(pre)（15 mg/kg）	0.56987	0.4709	0.3759			0.2462	0.2596	0.2915
peitc(pre)（30 mg/kg）	0.3349	0.3271	0.354	0.319099		0.2482	0.2748	0.2605	0.2505
peitc(post)（30 mg/kg ）	0.38397	0.36799	0.41837	0.3608	0.3588	0.293	0.2957	0.3498	0.2876	0.2868
ΔOD
Normal	0.031	0.04	0.0492	0.04781	0.0334
Model（ConA 10 mg/kg）		0.3537	0.115				Y=2943.5x3+1651.3x2+219.08x+1.0019
peitc(pre)（7.5 mg/kg）		0.1334	0.26454
peitc(pre)（15 mg/kg）	0.32367	0.2113	0.0844
peitc(pre)（30 mg/kg）	0.0867	0.0523	0.0935	0.068599
peitc(post)（30 mg/kg ）	0.09097	0.07229	0.06857	0.0732	0.072
ALT activity
Normal	9.46797	12.5956	16.1284	15.5723	10.271
Model（ConA 10 mg/kg）		830.643	105.022
peitc(pre)（7.5 mg/kg）		133.201	458.021
peitc(pre)（15 mg/kg）	344.715	148.789	33.0247
peitc(pre)（30 mg/kg）	34.3271	17.3976	38.328	24.7515
peitc(post)（30 mg/kg ）	36.8129	26.5806	24.7374	27.0411	26.4347
Application: Tecan i-control				Tecan i-control , 1.10.4.0
Device: infinite 200Pro				Serial number: 1405000424				Serial number of connected stacker:
Firmware: V_3.37_07/12_Infinite (Jul 20 2012/13.56.47)				MAI, V_3.37_07/12_Infinite (Jul 20 2012/13.56.47)
System				WIN-TNLULF1QTDO
User				WIN-TNLULF1QTDO\Administrator
Plate				ThermoFischer Scientific-Nunclon 96 Flat Bottom Black Polystyrol Catalog No.: 137101/137103/237105/237107/237108/437111/437112 [NUN96fb.pdfx]
Plate-ID (Stacker)
Label: Label1
Mode				Absorbance
Wavelength				510	nm
Bandwidth				9	nm
Settle Time				0	ms
	treatment group						control group
	6	7	8	9	10
Normal	0.3489	0.3528	0.3532	0.3385			0.3179	0.3125	0.3158	0.3134
Model（ConA 10 mg/kg）	0.7371	0.75607	0.7397	0.490907			0.3133	0.2913	0.3013	0.312984
peitc(pre)（7.5 mg/kg）	0.4729	0.59589	0.419				0.2528	0.253	0.2425
peitc(pre)（15 mg/kg）	0.5179	0.6759	0.578	0.3616			0.3216	0.3082	0.3202	0.310111
peitc(pre)（30 mg/kg）	0.40821	0.38053	0.4456	0.3838			0.3299	0.3215	0.329798	0.3219
peitc(post)（30 mg/kg ）	0.4259	0.44192	0.5282	0.40659			0.3269	0.3512	0.3192	0.3212
ΔOD
Normal	0.031	0.0403	0.0374	0.0251
Model（ConA 10 mg/kg）	0.4238	0.46477	0.4384	0.177923			Y=2943.5x3+1651.3x2+219.08x+1.0019
peitc(pre)（7.5 mg/kg）	0.2201	0.34289	0.1765
peitc(pre)（15 mg/kg）	0.1963	0.3677	0.2578	0.051489
peitc(pre)（30 mg/kg）	0.07831	0.05903	0.115802	0.0619
peitc(post)（30 mg/kg ）	0.099	0.09072	0.209	0.08539
ALT activity
Normal	9.46797	12.7053	11.6592	7.58769
Model（ConA 10 mg/kg）	614.483	755.037	662.431	108.835
peitc(pre)（7.5 mg/kg）	160.602	388.938	107.295
peitc(pre)（15 mg/kg）	129.903	451.153	217.66	17.0617
peitc(pre)（30 mg/kg）	29.6981	20.2937	53.0867	21.5882
peitc(post)（30 mg/kg ）	41.7313	36.6649	145.792	33.5822

## Sheet: AST
Application: Tecan i-control				Tecan i-control , 1.10.4.0
Device: infinite 200Pro				Serial number: 1405000424				Serial number of connected stacker:
Firmware: V_3.37_07/12_Infinite (Jul 20 2012/13.56.47)				MAI, V_3.37_07/12_Infinite (Jul 20 2012/13.56.47)
System				WIN-TNLULF1QTDO
User				WIN-TNLULF1QTDO\Administrator
Plate				ThermoFischer Scientific-Nunclon 96 Flat Bottom Black Polystyrol Catalog No.: 137101/137103/237105/237107/237108/437111/437112 [NUN96fb.pdfx]
Plate-ID (Stacker)
Label: Label1
Mode				Absorbance
Wavelength				510	nm
Bandwidth				9	nm
Settle Time				0	ms
AST standard curve	0	1	2	3	4
	0.2525	0.3083	0.3619	0.4048	0.451
ΔOD	0	0.0558	0.1094	0.1523	0.1985
enzyme activity	0	24	61	114	190
	treatment group					control group
<>	1	2	3	4	5
Normal	0.3034	0.2973	0.3215	0.2929	0.299	0.2547	0.2544	0.2594	0.2543	0.2574
Model（ConA 10 mg/kg）	0.3405	0.3201	0.3232	0.3269	0.4676	0.259	0.2552	0.2559	0.25473	0.260113
peitc(pre)（7.5 mg/kg）	0.3302	0.33081	0.3844	0.3088	0.3022	0.2401	0.246	0.2451	0.24601	0.245103
peitc(pre)（15 mg/kg）	0.3453	0.362	0.379	0.37912	0.372	0.2531	0.2591	0.258368	0.257883	0.2683
peitc(pre)（30 mg/kg）	0.30912	0.3191	0.3287	0.3236	0.2998	0.2403	0.2591	0.2683	0.258274	0.257378
peitc(post)（30 mg/kg ）	0.3961	0.4153	0.4793	0.4141	0.3495	0.3041	0.2871	0.3349	0.3024	0.2745
D
ΔOD
Normal	0.0487	0.0429	0.0621	0.0386	0.0416
Model（ConA 10 mg/kg）	0.0815	0.0649	0.0673	0.0721703	0.207487
peitc(pre)（7.5 mg/kg）	0.0901	0.08481	0.1393	0.0627898	0.0570971		Y=9365.9x3+1456.4x2+299.65x+0.2039
peitc(pre)（15 mg/kg）	0.0922	0.1029	0.120632	0.121237	0.1037
peitc(pre)（30 mg/kg）	0.06882	0.06	0.0604	0.0653261	0.0424217
peitc(post)（30 mg/kg ）	0.092	0.1282	0.1444	0.1117	0.075
AST activity
Normal	19.3318	16.4777	26.6706	14.478	15.863
Model（ConA 10 mg/kg）	78.7366	56.6896	59.6415	65.8702	417.475
peitc(pre)（7.5 mg/kg）	91.7499	83.6101	191.043	54.1567	47.6068
peitc(pre)（15 mg/kg）	47.552	56.6625	73.9848	74.6283	57.3828
peitc(pre)（30 mg/kg）	30.7754	25.448	25.6787	28.6041	16.2505
peitc(post)（30 mg/kg ）	47.3908	82.2883	102.04	64.8981	34.8201
Application: Tecan i-control				Tecan i-control , 1.10.4.0
Device: infinite 200Pro				Serial number: 1405000424				Serial number of connected stacker:
Firmware: V_3.37_07/12_Infinite (Jul 20 2012/13.56.47)				MAI, V_3.37_07/12_Infinite (Jul 20 2012/13.56.47)
System				WIN-TNLULF1QTDO
User				WIN-TNLULF1QTDO\Administrator
Plate				ThermoFischer Scientific-Nunclon 96 Flat Bottom Black Polystyrol Catalog No.: 137101/137103/237105/237107/237108/437111/437112 [NUN96fb.pdfx]
Plate-ID (Stacker)
Label: Label2
Mode				Absorbance
Wavelength				510	nm
Bandwidth				9	nm
Settle Time				0	ms
	treatment group						control group
	6	7	8	9	10
Normal	0.3228	0.32114					0.2888	0.266
Model（ConA 10 mg/kg）	0.53916	0.3665	0.4559	0.5516			0.2672	0.2646	0.2707	0.273645
peitc(pre)（7.5 mg/kg）	0.3601	0.3639	0.39459	0.484319			0.2547	0.2647	0.2736	0.2949
peitc(pre)（15 mg/kg）	0.37095	0.3821	0.3839	0.4217	0.43717		0.2666	0.2794	0.2791	0.280174	0.281648
peitc(pre)（30 mg/kg）	0.3742	0.39144	0.3843	0.40274	0.4028		0.2951	0.2816	0.279636	0.284538	0.278276
peitc(post)（30 mg/kg ）	0.3981	0.3853	0.3333	0.4547			0.2722	0.3092	0.2784	0.3369
ΔOD
Normal	0.034	0.05514
Model（ConA 10 mg/kg）	0.27196	0.1019	0.1852	0.277955
peitc(pre)（7.5 mg/kg）	0.1054	0.0992	0.12099	0.189419			Y=9365.9x3+1456.4x2+299.65x+0.2039
peitc(pre)（15 mg/kg）	0.10435	0.1027	0.1048	0.141527	0.155521
peitc(pre)（30 mg/kg）	0.0791	0.10984	0.104664	0.118202	0.124524
peitc(post)（30 mg/kg ）	0.1259	0.0761	0.0549	0.1178
AST activity
Normal	12.4427	22.7238
Model（ConA 10 mg/kg）	377.807	55.7699	165.145	397.14
peitc(pre)（7.5 mg/kg）	58.932	53.403	74.3653	172.87
peitc(pre)（15 mg/kg）	57.9721	56.4832	58.3823	98.3327	117.261
peitc(pre)（30 mg/kg）	37.6529	63.0994	58.2583	71.4384	78.1841
peitc(post)（30 mg/kg ）	79.7047	35.5682	22.5931	71.0223

## Sheet: LDH
	1	2	3	4	5	6	7	8	9	10	11	12
A	0.566	0.562	0.612	0.549	0.579	0.248	0.662	0.689	0.343	0.288	0.112	0.111	450
B	0.344	0.227	0.358	0.265	0.23	0.257	0.303	0.039	0.46	0.502	0.286	0.28	450
C	0.664	0.514	0.624	0.646	0.477	0.424	0.604	0.675	0.512	0.523	0.039	0.038	450
D	0.151	0.152	0.167	0.153	0.151	0.162	0.171	0.155	0.122	0.126	0.121	0.039	450
E	0.124	0.125	0.127	0.123	0.126	0.151	0.151	0.162	0.163	0.04	0.039	0.04	450
blank group	0.112	0.111
standard group	0.286	0.28
	treatment group
	1	2	3	4	5	control group						average
Normal	0.566	0.562	0.612	0.549	0.579	0.162	0.171	0.155	（2/3/4）			0.1585
Model（ConA 10 mg/kg）	0.248	0.662	0.689	0.343	0.288	0.122	0.126	0.121	（2/4/5）			0.123
peitc(pre)（7.5 mg/kg）	0.344	0.227	0.358	0.265	0.23	0.124	0.125	0.127	（3/4/5）			0.125333
peitc(pre)（15 mg/kg）	0.257	0.303		0.46	0.502	0.123	0.126	0.151	（1/2/4）			0.133333
peitc(pre)（30 mg/kg）	0.664	0.514	0.624	0.646	0.477	0.151	0.162	0.163	（1/4/5）			0.158667
peitc(post)（30 mg/kg ）	0.424	0.604	0.675	0.512	0.523	0.151	0.152	0.167	0.153	0.151		0.1548
standard group-blank group value	0.1715
Standard concentration	0.2 μmol/ml
	LDH activity(U/L)=		treatment group-control group value		*	Standard concentration		*	Dilution times	*	1000
			standard group-blank group value
treatment group-control group value
Normal	0.4075	0.4035	0.4535	0.3905	0.4205
Model（ConA 10 mg/kg）	0.125	0.539	0.566	0.22	0.165
peitc(pre)（7.5 mg/kg）	0.218667	0.101667	0.232667	0.139667	0.104667
peitc(pre)（15 mg/kg）	0.123667	0.169667		0.326667	0.368667
peitc(pre)（30 mg/kg）	0.505333	0.355333	0.465333	0.487333	0.318333
peitc(post)（30 mg/kg ）	0.2692	0.4492	0.5202	0.3572	0.3682
LDH（U/L）
Normal	4752.19	4705.54	5288.63	4553.94	4903.79
Model（ConA 10 mg/kg）	7288.63	62857.1	66005.8	12828	9620.99
peitc(pre)（7.5 mg/kg）	12750.2	5928.09	27133.1	8143.83	6103.01
peitc(pre)（15 mg/kg）	14421.8	19786.2		7619.05	8598.64
peitc(pre)（30 mg/kg）	5893.1	4143.83	5426.63	5683.19	3712.34
peitc(post)（30 mg/kg ）	6278.72	10477	12132.9	8331.2	8587.76
