# Supplementary material for: Direct Inhibition of GSDMD by PEITC Reduces Hepatocyte Pyroptosis and Alleviates Acute Liver Injury in Mice
Source: Frontiers journal article supplement (doi:10.3389/fimmu.2022.825428), 2022-01-31
Supplement: Presentation_1.zip [file Figure 2B.xlsx]

## Sheet: TNF-α
	1	2	3	4	5
A	0.208	1.436	0.988	0.885	0.762	450
B	0.502	1.647	0.923	0.822	0.346	450
C	0.768	2.036	1.052	0.498	1.004	450
D	1.427	0.891	0.872	1.267	0.439	450
E	2.424	0.255	1.407	0.783	0.877	450
F	3.161	0.235	0.586	0.916	0.39	450
G	3.188	0.216	1.031	1.073	0.808	450
H	3.105	0.221	1.148	0.438	0.904	450
standard curve
OD	0.151	0.202	0.328	0.538	1.001	1.705	2.686	3.605
TNF-α（pg/mL）	0	15.6	31.3	62.5	125	250	500	1000
Normal	0.221	0.216	0.235	0.255
Model（ConA 10 mg/kg）	0.891	2.036	1.647	1.436	1.148	1.031	0.586
peitc(pre)（7.5 mg/kg）	1.407	0.872	1.052	0.923	0.988	0.438
peitc(pre)（15 mg/kg）	1.073	0.916	0.783	1.267	0.498
peitc(pre)（30 mg/kg）	0.822	0.885	0.904	0.808	0.39
peitc(post)（30 mg/kg ）	0.877	0.439	1.004	0.346	0.762
TNF-α(pg/mL)
Normal	25.4778	25.3081		25.9723	26.7283
Model（ConA 10 mg/kg）	81.1754	327.819	445.184	222.592	239.806	101.078	47.707
peitc(pre)（7.5 mg/kg）	168.672	78.6944		170.945	94.6613	36.3529
peitc(pre)（15 mg/kg）	107.606	84.5199	67.7737	141.096	40.5711
peitc(pre)（30 mg/kg）	72.417	80.3862	82.9032	70.7247	33.3561
peitc(post)（30 mg/kg ）	79.3422	36.4189	97.0176	30.9041	65.3652

## Sheet: IFN-γ
	1	2	3	4	5
A	3.146	0.102	1.259	0.723	0	450
B	3.145	0.104	3.153	2.885	0	450
C	2.962	0.092	2.69	0.937	0	450
D	2.23	0.085	1.86	2.726	0	450
E	1.34	2.589	2.7	2.735	0	450
F	0.765	3.049	2.21	2.804	2.379	450
G	0.391	2.883	2.801	2.749	0.715	450
H	0.11	3.083	3.055	0.884	2.822	450
standard curve
OD	0.107	0.363	0.464	1.092	1.748	3.024	3.523
IFN-γ（pg/mL）	0	15.6	31.3	62.5	125	250	500
	1	2	3	4	5
Normal	0.102	0.104		0.092	0.085
Model（ConA 10 mg/kg）	2.589	3.049	2.883	3.083	1.259
peitc(pre)（7.5 mg/kg）	3.153	2.69	1.86	2.7	2.21
peitc(pre)（15 mg/kg）	2.801	3.055	0.937	2.885	0.723
peitc(pre)（30 mg/kg）	2.726	2.735	2.804	2.749	0.884
peitc(post)（30 mg/kg ）	2.822			0.715	2.379
IFN-γ（pg/mL）
Normal	4.99695	4.99906		5.00479	5.02879
Model（ConA 10 mg/kg）	164.304	260.746	214.831	272.115	89.6172
peitc(pre)（7.5 mg/kg）	297.893	178.037	241.189	179.581	134.444
peitc(pre)（15 mg/kg）	197.291	262.7	125.95	215.298	43.122
peitc(pre)（30 mg/kg）	183.764	185.271	197.88	187.676	58.1124
peitc(post)（30 mg/kg ）	201.495	6.6191	6.6191	42.3817	144.515
