# Supplementary material for: Direct Inhibition of GSDMD by PEITC Reduces Hepatocyte Pyroptosis and Alleviates Acute Liver Injury in Mice
Source: Frontiers journal article supplement (doi:10.3389/fimmu.2022.825428), 2022-01-31
Supplement: Presentation_1.zip [file Figure 2C.xlsx]

## Sheet: Actin
File Name	admin_2019-10-14 19-57-41_BR002355.pcrd
Created By User	admin
Notes
ID
Run Started	10/14/2019 11:57:52 UTC
Run Ended	10/14/2019 13:13:35 UTC
Sample Vol	10
Lid Temp	105
Protocol File Name	120109-IQmelt curve.prcl
Plate Setup File Name	20191014.pltd
Base Serial Number	BR002355
Optical Head Serial Number	788BR02281
CFX Manager Version	3.1.1517.0823.
Well group	All Wells
Amplification step	3
Melt step	5
Well	Fluor	Target	Content	Sample	Cq	Starting Quantity (SQ)
A07	SYBR	Actin	Unkn	N1	19.5348
A08	SYBR	Actin	Unkn	N1	19.2824
A09	SYBR	Actin	Unkn	N1	19.585
A10	SYBR	Actin	Unkn	N2	21.9501
A11	SYBR	Actin	Unkn	N2	21.9284
A12	SYBR	Actin	Unkn	N2	22.2307
B01	SYBR	Actin	Unkn	N3	21.7083
B02	SYBR	Actin	Unkn	N3	21.6004
B03	SYBR	Actin	Unkn	N3	21.6591	21.0532
B04	SYBR	Actin	Unkn	M1	22.1711
B05	SYBR	Actin	Unkn	M1	22.0962
B06	SYBR	Actin	Unkn	M1	22.0669
B07	SYBR	Actin	Unkn	M2	18.6492
B08	SYBR	Actin	Unkn	M2	18.6308
B09	SYBR	Actin	Unkn	M2	18.5408
B10	SYBR	Actin	Unkn	M3	19.3075
B11	SYBR	Actin	Unkn	M3	19.1579
B12	SYBR	Actin	Unkn	M3	19.2454
C01	SYBR	Actin	Unkn	M4	19.7853
C02	SYBR	Actin	Unkn	M4	19.7454
C03	SYBR	Actin	Unkn	M4	19.8908
C04	SYBR	Actin	Unkn	M5	20.4125
C05	SYBR	Actin	Unkn	M5	20.2378
C06	SYBR	Actin	Unkn	M5	20.2469	20.0123
C07	SYBR	Actin	Unkn	PEITC(pre 7.5) 1	18.712
C08	SYBR	Actin	Unkn	PEITC(pre 7.5) 1	18.8246
C09	SYBR	Actin	Unkn	PEITC(pre 7.5) 1	18.7386
C10	SYBR	Actin	Unkn	PEITC(pre 7.5)2	18.8371
C11	SYBR	Actin	Unkn	PEITC(pre 7.5)2	18.7095
C12	SYBR	Actin	Unkn	PEITC(pre 7.5)2	19.0238
D01	SYBR	Actin	Unkn	PEITC(pre 7.5)3	18.9433
D02	SYBR	Actin	Unkn	PEITC(pre 7.5)3	18.8469
D03	SYBR	Actin	Unkn	PEITC(pre 7.5)3	18.9089
D04	SYBR	Actin	Unkn	PEITC(pre 7.5)4	19.8916
D05	SYBR	Actin	Unkn	PEITC(pre 7.5)4	19.651
D06	SYBR	Actin	Unkn	PEITC(pre 7.5)4	19.6477
D07	SYBR	Actin	Unkn	PEITC(pre 7.5)5	20.0246
D08	SYBR	Actin	Unkn	PEITC(pre 7.5)5	20.2221
D09	SYBR	Actin	Unkn	PEITC(pre 7.5)5	20.0853	19.2711
D10	SYBR	Actin	Unkn	PEITC(pre 15)1	19.3337
D11	SYBR	Actin	Unkn	PEITC(pre 15)1	19.2443
D12	SYBR	Actin	Unkn	PEITC(pre 15)1	19.4334
E01	SYBR	Actin	Unkn	PEITC(pre 15)2	19.0053
E02	SYBR	Actin	Unkn	PEITC(pre 15)2	18.8703
E03	SYBR	Actin	Unkn	PEITC(pre 15)2	18.7456
E04	SYBR	Actin	Unkn	PEITC(pre 15)3	18.3999
E05	SYBR	Actin	Unkn	PEITC(pre 15)3	18.1304
E06	SYBR	Actin	Unkn	PEITC(pre 15)3	18.2174
E07	SYBR	Actin	Unkn	PEITC(pre 15)4	20.2208
E08	SYBR	Actin	Unkn	PEITC(pre 15)4	20.1575
E09	SYBR	Actin	Unkn	PEITC(pre 15)4	20.2637
E10	SYBR	Actin	Unkn	PEITC(pre 15)5	20.0803
E11	SYBR	Actin	Unkn	PEITC(pre 15)5	20.0152
E12	SYBR	Actin	Unkn	PEITC(pre 15)5	20.1614	19.3519
F01	SYBR	Actin	Unkn	PEITC(pre 30)1	20.1254
F02	SYBR	Actin	Unkn	PEITC(pre 30)1	19.9263
F03	SYBR	Actin	Unkn	PEITC(pre 30)1	19.9597
F04	SYBR	Actin	Unkn	PEITC(pre 30)2	19.568
F05	SYBR	Actin	Unkn	PEITC(pre 30)2	19.3126
F06	SYBR	Actin	Unkn	PEITC(pre 30)2	19.5223
F07	SYBR	Actin	Unkn	PEITC(pre 30)3	19.1659
F08	SYBR	Actin	Unkn	PEITC(pre 30)3	19.1309
F09	SYBR	Actin	Unkn	PEITC(pre 30)3	19.3595
F10	SYBR	Actin	Unkn	PEITC(pre 30)4	19.5751
F11	SYBR	Actin	Unkn	PEITC(pre 30)4	19.3405
F12	SYBR	Actin	Unkn	PEITC(pre 30)4	19.5002
G01	SYBR	Actin	Unkn	PEITC(pre 30)5	20.4943
G02	SYBR	Actin	Unkn	PEITC(pre 30)5	20.4861
G03	SYBR	Actin	Unkn	PEITC(pre 30)5	20.5239	19.7327
G04	SYBR	Actin	Unkn	PEITC(post 30)1	19.6734
G05	SYBR	Actin	Unkn	PEITC(post 30)1	19.6401
G06	SYBR	Actin	Unkn	PEITC(post 30)1	19.5279
G07	SYBR	Actin	Unkn	PEITC(post 30)2	19.0673
G08	SYBR	Actin	Unkn	PEITC(post 30)2	19.0607
G09	SYBR	Actin	Unkn	PEITC(post 30)2	19.2212
G10	SYBR	Actin	Unkn	PEITC(post 30)3	18.9308
G11	SYBR	Actin	Unkn	PEITC(post 30)3	18.8424
G12	SYBR	Actin	Unkn	PEITC(post 30)3	19.0551
H01	SYBR	Actin	Unkn	PEITC(post 30)4	19.4323
H02	SYBR	Actin	Unkn	PEITC(post 30)4	19.3526
H03	SYBR	Actin	Unkn	PEITC(post 30)4	19.153
H04	SYBR	Actin	Unkn	PEITC(post 30)5	19.2543
H05	SYBR	Actin	Unkn	PEITC(post 30)5	19.3157
H06	SYBR	Actin	Unkn	PEITC(post 30)5	19.0905	19.2412

## Sheet: TNF
File Name	admin_2019-10-14 21-16-15_BR002355.pcrd
Created By User	admin
Notes
ID
Run Started	10/14/2019 13:16:30 UTC
Run Ended	10/14/2019 14:30:56 UTC
Sample Vol	10
Lid Temp	105
Protocol File Name	120109-IQmelt curve.prcl
Plate Setup File Name	20191014.pltd
Base Serial Number	BR002355
Optical Head Serial Number	788BR02281
CFX Manager Version	3.1.1517.0823.
Well group	All Wells
Amplification step	3
Melt step	5
Well	Fluor	Target	Content	Sample	Cq	Starting Quantity (SQ)
A07	SYBR	TNF-a	Unkn	N1	32.2194	19.5348
A08	SYBR	TNF-a	Unkn	N1	31.9635	19.2824
A09	SYBR	TNF-a	Unkn	N1	32.3556	19.585	32.1795	19.4674	12.7121
A10	SYBR	TNF-a	Unkn	N2	32.5144	21.9501
A11	SYBR	TNF-a	Unkn	N2	32.5973	21.9284
A12	SYBR	TNF-a	Unkn	N2	33.1211	22.2307	32.7443	22.0364	10.7078
B01	SYBR	TNF-a	Unkn	N3	33.255	21.7083
B02	SYBR	TNF-a	Unkn	N3	32.8045	21.6004
B03	SYBR	TNF-a	Unkn	N3	32.9142	21.6591	32.9912	21.6559	11.3353	11.5851	0	1
B04	SYBR	TNF-a	Unkn	M1	29.1504	22.1711
B05	SYBR	TNF-a	Unkn	M1	28.838	22.0962
B06	SYBR	TNF-a	Unkn	M1	28.9629	22.0669	28.9838	22.1114	6.87236		-4.71272	26.2223
B07	SYBR	TNF-a	Unkn	M2	26.517	18.6492
B08	SYBR	TNF-a	Unkn	M2	26.443	18.6308
B09	SYBR	TNF-a	Unkn	M2	26.7365	18.5408	26.5655	18.6069	7.95856		-3.62652	12.3507
B10	SYBR	TNF-a	Unkn	M3	27.0546	19.3075
B11	SYBR	TNF-a	Unkn	M3	26.8864	19.1579
B12	SYBR	TNF-a	Unkn	M3	27.079	19.2454	27.0067	19.2369	7.76973		-3.81536	14.0778
C01	SYBR	TNF-a	Unkn	M4	28.8898	19.7853
C02	SYBR	TNF-a	Unkn	M4	28.9147	19.7454
C03	SYBR	TNF-a	Unkn	M4	29.068	19.8908	28.9575	19.8071	9.15039		-2.43469	5.4065
C04	SYBR	TNF-a	Unkn	M5	29.1866	20.4125
C05	SYBR	TNF-a	Unkn	M5	29.6175	20.2378
C06	SYBR	TNF-a	Unkn	M5	29.6486	20.2469	29.4842	20.2991	9.18519		-2.39989	5.27763
C07	SYBR	TNF-a	Unkn	PEITC(pre 7.5) 1	27.755	18.712
C08	SYBR	TNF-a	Unkn	PEITC(pre 7.5) 1	27.4401	18.8246
C09	SYBR	TNF-a	Unkn	PEITC(pre 7.5) 1	27.536	18.7386	27.577	18.7584	8.81866		-2.76642	6.80419
C10	SYBR	TNF-a	Unkn	PEITC(pre 7.5)2		18.8371
C11	SYBR	TNF-a	Unkn	PEITC(pre 7.5)2	28.0498	18.7095
C12	SYBR	TNF-a	Unkn	PEITC(pre 7.5)2	28.1525	19.0238	28.1011	18.8568	9.24434		-2.34074	5.06562
D01	SYBR	TNF-a	Unkn	PEITC(pre 7.5)3		18.9433
D02	SYBR	TNF-a	Unkn	PEITC(pre 7.5)3	26.6442	18.8469
D03	SYBR	TNF-a	Unkn	PEITC(pre 7.5)3	26.7452	18.9089	26.6947	18.8997	7.79496		-3.79012	13.8337
D04	SYBR	TNF-a	Unkn	PEITC(pre 7.5)4	28.5492	19.8916
D05	SYBR	TNF-a	Unkn	PEITC(pre 7.5)4		19.651
D06	SYBR	TNF-a	Unkn	PEITC(pre 7.5)4	28.3971	19.6477	28.4731	19.7301	8.74304		-2.84204	7.17034
D07	SYBR	TNF-a	Unkn	PEITC(pre 7.5)5	28.4644	20.0246
D08	SYBR	TNF-a	Unkn	PEITC(pre 7.5)5	28.6687	20.2221
D09	SYBR	TNF-a	Unkn	PEITC(pre 7.5)5		20.0853	28.5666	20.1107	8.45592		-3.12916	8.74928
D10	SYBR	TNF-a	Unkn	PEITC(pre 15)1	28.2376	19.3337
D11	SYBR	TNF-a	Unkn	PEITC(pre 15)1	28.0683	19.2443
D12	SYBR	TNF-a	Unkn	PEITC(pre 15)1	28.7112	19.4334	28.339	19.3371	9.00191		-2.58318	5.99257
E01	SYBR	TNF-a	Unkn	PEITC(pre 15)2	26.4615	19.0053
E02	SYBR	TNF-a	Unkn	PEITC(pre 15)2		18.8703
E03	SYBR	TNF-a	Unkn	PEITC(pre 15)2	26.1441	18.7456	26.3028	18.8737	7.42907		-4.15601	17.8272
E04	SYBR	TNF-a	Unkn	PEITC(pre 15)3	26.522	18.3999
E05	SYBR	TNF-a	Unkn	PEITC(pre 15)3	26.6136	18.1304
E06	SYBR	TNF-a	Unkn	PEITC(pre 15)3	26.419	18.2174	26.5182	18.2492	8.26898		-3.3161	9.95968
E07	SYBR	TNF-a	Unkn	PEITC(pre 15)4	29.7588	20.2208
E08	SYBR	TNF-a	Unkn	PEITC(pre 15)4	30.0476	20.1575
E09	SYBR	TNF-a	Unkn	PEITC(pre 15)4	30.0196	20.2637	29.942	20.214	9.72797		-1.85711	3.62282
E10	SYBR	TNF-a	Unkn	PEITC(pre 15)5	29.7949	20.0803
E11	SYBR	TNF-a	Unkn	PEITC(pre 15)5	29.968	20.0152
E12	SYBR	TNF-a	Unkn	PEITC(pre 15)5	30.0354	20.1614	29.9328	20.0857	9.84713		-1.73795	3.33562
F01	SYBR	TNF-a	Unkn	PEITC(pre 30)1	28.072	20.1254
F02	SYBR	TNF-a	Unkn	PEITC(pre 30)1	27.8048	19.9263
F03	SYBR	TNF-a	Unkn	PEITC(pre 30)1	27.7654	19.9597	27.8808	20.0038	7.87697		-3.70811	13.0693
F04	SYBR	TNF-a	Unkn	PEITC(pre 30)2	28.1968	19.568
F05	SYBR	TNF-a	Unkn	PEITC(pre 30)2	27.9125	19.3126
F06	SYBR	TNF-a	Unkn	PEITC(pre 30)2	27.9767	19.5223	28.0286	19.4676	8.56103		-3.02405	8.13447
F07	SYBR	TNF-a	Unkn	PEITC(pre 30)3	27.8761	19.1659
F08	SYBR	TNF-a	Unkn	PEITC(pre 30)3		19.1309
F09	SYBR	TNF-a	Unkn	PEITC(pre 30)3	28.1	19.3595	27.9881	19.2188	8.76929		-2.81579	7.04104
F10	SYBR	TNF-a	Unkn	PEITC(pre 30)4	27.9073	19.5751
F11	SYBR	TNF-a	Unkn	PEITC(pre 30)4	27.9781	19.3405
F12	SYBR	TNF-a	Unkn	PEITC(pre 30)4	28.2201	19.5002	28.0351	19.4719	8.56323		-3.02185	8.12208
G01	SYBR	TNF-a	Unkn	PEITC(pre 30)5	29.184	20.4943
G02	SYBR	TNF-a	Unkn	PEITC(pre 30)5	29.0025	20.4861
G03	SYBR	TNF-a	Unkn	PEITC(pre 30)5	28.8747	20.5239	29.0204	20.5014	8.51898		-3.0661	8.37508
G04	SYBR	TNF-a	Unkn	PEITC(post 30)1	28.1398	19.6734
G05	SYBR	TNF-a	Unkn	PEITC(post 30)1	28.0085	19.6401
G06	SYBR	TNF-a	Unkn	PEITC(post 30)1	28.0877	19.5279	28.0787	19.6138	8.46489		-3.12019	8.69501
G07	SYBR	TNF-a	Unkn	PEITC(post 30)2	28.0416	19.0673
G08	SYBR	TNF-a	Unkn	PEITC(post 30)2	28.1152	19.0607
G09	SYBR	TNF-a	Unkn	PEITC(post 30)2	28.4676	19.2212	28.2081	19.1164	9.09177		-2.49331	5.63069
G10	SYBR	TNF-a	Unkn	PEITC(post 30)3	27.534	18.9308
G11	SYBR	TNF-a	Unkn	PEITC(post 30)3	27.5215	18.8424
G12	SYBR	TNF-a	Unkn	PEITC(post 30)3	27.6826	19.0551	27.5794	18.9428	8.63657		-2.94851	7.71952
H01	SYBR	TNF-a	Unkn	PEITC(post 30)4		19.4323
H02	SYBR	TNF-a	Unkn	PEITC(post 30)4	29.5946	19.3526
H03	SYBR	TNF-a	Unkn	PEITC(post 30)4	29.4727	19.153	29.5336	19.3126	10.221		-1.36406	2.57408
H04	SYBR	TNF-a	Unkn	PEITC(post 30)5	28.18	19.2543
H05	SYBR	TNF-a	Unkn	PEITC(post 30)5	28.2612	19.3157
H06	SYBR	TNF-a	Unkn	PEITC(post 30)5	28.0729	19.0905	28.1714	19.2202	8.95119		-2.6339	6.207

## Sheet: IFN
File Name	admin_2019-10-14 22-36-55_BR002355.pcrd
Created By User	admin
Notes
ID
Run Started	10/14/2019 14:37:06 UTC
Run Ended	10/14/2019 15:51:56 UTC
Sample Vol	10
Lid Temp	105
Protocol File Name	120109-IQmelt curve.prcl
Plate Setup File Name	20191014.pltd
Base Serial Number	BR002355
Optical Head Serial Number	788BR02281
CFX Manager Version	3.1.1517.0823.
Well group	All Wells
Amplification step	3
Melt step	5
Well	Fluor	Target	Content	Sample	Cq	Starting Quantity (SQ)
A07	SYBR	IFN-r	Unkn	N1	32.9575	19.5348
A08	SYBR	IFN-r	Unkn	N1	32.6214	19.2824
A09	SYBR	IFN-r	Unkn	N1	33.1417	19.585	32.9069	19.4674	13.4395
A10	SYBR	IFN-r	Unkn	N2		21.9501
A11	SYBR	IFN-r	Unkn	N2	34.0106	21.9284
A12	SYBR	IFN-r	Unkn	N2	33.7144	22.2307	33.8625	22.0364	11.8261
B01	SYBR	IFN-r	Unkn	N3	33.8309	21.7083
B02	SYBR	IFN-r	Unkn	N3	33.6977	21.6004
B03	SYBR	IFN-r	Unkn	N3		21.6591	33.7643	21.6559	12.1083	12.458	0	1
B04	SYBR	IFN-r	Unkn	M1	30.3569	22.1711
B05	SYBR	IFN-r	Unkn	M1	30.3556	22.0962
B06	SYBR	IFN-r	Unkn	M1	30.3309	22.0669	30.3478	22.1114	8.23637		-4.22162	18.6567
B07	SYBR	IFN-r	Unkn	M2	26.1334	18.6492
B08	SYBR	IFN-r	Unkn	M2	26.2506	18.6308
B09	SYBR	IFN-r	Unkn	M2	26.2313	18.5408	26.2051	18.6069	7.59817		-4.85981	29.0368
B10	SYBR	IFN-r	Unkn	M3	27.0281	19.3075
B11	SYBR	IFN-r	Unkn	M3	26.8062	19.1579
B12	SYBR	IFN-r	Unkn	M3	27.2692	19.2454	27.0345	19.2369	7.79759		-4.6604	25.2883
C01	SYBR	IFN-r	Unkn	M4	28.1518	19.7853
C02	SYBR	IFN-r	Unkn	M4	28.0545	19.7454
C03	SYBR	IFN-r	Unkn	M4	27.9345	19.8908	28.0469	19.8071	8.23981		-4.21817	18.6121
C04	SYBR	IFN-r	Unkn	M5	29.9953	20.4125
C05	SYBR	IFN-r	Unkn	M5	30.0006	20.2378
C06	SYBR	IFN-r	Unkn	M5	29.9695	20.2469	29.9885	20.2991	9.68941		-2.76858	6.81435
C07	SYBR	IFN-r	Unkn	PEITC(pre 7.5) 1	26.6747	18.712
C08	SYBR	IFN-r	Unkn	PEITC(pre 7.5) 1	26.6282	18.8246
C09	SYBR	IFN-r	Unkn	PEITC(pre 7.5) 1	26.8238	18.7386	26.7089	18.7584	7.95054		-4.50745	22.7445
C10	SYBR	IFN-r	Unkn	PEITC(pre 7.5)2	26.3457	18.8371
C11	SYBR	IFN-r	Unkn	PEITC(pre 7.5)2	26.3274	18.7095
C12	SYBR	IFN-r	Unkn	PEITC(pre 7.5)2	26.2831	19.0238	26.3187	18.8568	7.46195		-4.99604	31.9122
D01	SYBR	IFN-r	Unkn	PEITC(pre 7.5)3	27.0528	18.9433
D02	SYBR	IFN-r	Unkn	PEITC(pre 7.5)3	26.8902	18.8469
D03	SYBR	IFN-r	Unkn	PEITC(pre 7.5)3	26.7233	18.9089	26.8888	18.8997	7.98905		-4.46894	22.1454
D04	SYBR	IFN-r	Unkn	PEITC(pre 7.5)4	28.2128	19.8916
D05	SYBR	IFN-r	Unkn	PEITC(pre 7.5)4	28.0791	19.651
D06	SYBR	IFN-r	Unkn	PEITC(pre 7.5)4	28.2163	19.6477	28.1694	19.7301	8.43931		-4.01867	16.2084
D07	SYBR	IFN-r	Unkn	PEITC(pre 7.5)5	29.1896	20.0246
D08	SYBR	IFN-r	Unkn	PEITC(pre 7.5)5	29.2332	20.2221
D09	SYBR	IFN-r	Unkn	PEITC(pre 7.5)5	29.3451	20.0853	29.2559	20.1107	9.14528		-3.31271	9.93628
D10	SYBR	IFN-r	Unkn	PEITC(pre 15)1	27.4629	19.3337
D11	SYBR	IFN-r	Unkn	PEITC(pre 15)1	27.2539	19.2443
D12	SYBR	IFN-r	Unkn	PEITC(pre 15)1	27.5925	19.4334	27.4364	19.3371	8.09929		-4.3587	20.5163
E01	SYBR	IFN-r	Unkn	PEITC(pre 15)2	26.6223	19.0053
E02	SYBR	IFN-r	Unkn	PEITC(pre 15)2	26.6389	18.8703
E03	SYBR	IFN-r	Unkn	PEITC(pre 15)2	26.6727	18.7456	26.6446	18.8737	7.77092		-4.68706	25.76
E04	SYBR	IFN-r	Unkn	PEITC(pre 15)3	26.0061	18.3999
E05	SYBR	IFN-r	Unkn	PEITC(pre 15)3	25.8366	18.1304
E06	SYBR	IFN-r	Unkn	PEITC(pre 15)3	25.9485	18.2174	25.9304	18.2492	7.68119		-4.77679	27.4131
E07	SYBR	IFN-r	Unkn	PEITC(pre 15)4		20.2208
E08	SYBR	IFN-r	Unkn	PEITC(pre 15)4	30.9272	20.1575
E09	SYBR	IFN-r	Unkn	PEITC(pre 15)4	31.0065	20.2637	30.9668	20.214	10.7528		-1.70515	3.26064
E10	SYBR	IFN-r	Unkn	PEITC(pre 15)5	30.1935	20.0803
E11	SYBR	IFN-r	Unkn	PEITC(pre 15)5	30.3286	20.0152
E12	SYBR	IFN-r	Unkn	PEITC(pre 15)5	30.387	20.1614	30.303	20.0857	10.2174		-2.24061	4.72598
F01	SYBR	IFN-r	Unkn	PEITC(pre 30)1	28.0679	20.1254
F02	SYBR	IFN-r	Unkn	PEITC(pre 30)1	27.7153	19.9263
F03	SYBR	IFN-r	Unkn	PEITC(pre 30)1	27.545	19.9597	27.7761	20.0038	7.77227		-4.68571	25.7359
F04	SYBR	IFN-r	Unkn	PEITC(pre 30)2	27.9694	19.568
F05	SYBR	IFN-r	Unkn	PEITC(pre 30)2	27.6349	19.3126
F06	SYBR	IFN-r	Unkn	PEITC(pre 30)2	27.5841	19.5223	27.7295	19.4676	8.26184		-4.19614	18.3301
F07	SYBR	IFN-r	Unkn	PEITC(pre 30)3	27.149	19.1659
F08	SYBR	IFN-r	Unkn	PEITC(pre 30)3	27.0751	19.1309
F09	SYBR	IFN-r	Unkn	PEITC(pre 30)3	27.2342	19.3595	27.1527	19.2188	7.93398		-4.52401	23.0071
F10	SYBR	IFN-r	Unkn	PEITC(pre 30)4	27.6561	19.5751
F11	SYBR	IFN-r	Unkn	PEITC(pre 30)4	27.667	19.3405
F12	SYBR	IFN-r	Unkn	PEITC(pre 30)4	27.8992	19.5002	27.7408	19.4719	8.26887		-4.18911	18.241
G01	SYBR	IFN-r	Unkn	PEITC(pre 30)5	28.8558	20.4943
G02	SYBR	IFN-r	Unkn	PEITC(pre 30)5	28.8925	20.4861
G03	SYBR	IFN-r	Unkn	PEITC(pre 30)5	28.5815	20.5239	28.7766	20.5014	8.27516		-4.18283	18.1617
G04	SYBR	IFN-r	Unkn	PEITC(post 30)1	27.2665	19.6734
G05	SYBR	IFN-r	Unkn	PEITC(post 30)1	27.1783	19.6401
G06	SYBR	IFN-r	Unkn	PEITC(post 30)1	27.0313	19.5279	27.1587	19.6138	7.54486		-4.91312	30.1298
G07	SYBR	IFN-r	Unkn	PEITC(post 30)2	27.9205	19.0673
G08	SYBR	IFN-r	Unkn	PEITC(post 30)2	28.0952	19.0607
G09	SYBR	IFN-r	Unkn	PEITC(post 30)2	28.1629	19.2212	28.0595	19.1164	8.94317		-3.51482	11.4305
G10	SYBR	IFN-r	Unkn	PEITC(post 30)3	27.2126	18.9308
G11	SYBR	IFN-r	Unkn	PEITC(post 30)3	27.3932	18.8424
G12	SYBR	IFN-r	Unkn	PEITC(post 30)3	27.5214	19.0551	27.3757	18.9428	8.43294		-4.02504	16.2802
H01	SYBR	IFN-r	Unkn	PEITC(post 30)4	30.396	19.4323
H02	SYBR	IFN-r	Unkn	PEITC(post 30)4	30.5076	19.3526
H03	SYBR	IFN-r	Unkn	PEITC(post 30)4	30.233	19.153	30.3789	19.3126	11.0663		-1.39173	2.62394
H04	SYBR	IFN-r	Unkn	PEITC(post 30)5	27.4351	19.2543
H05	SYBR	IFN-r	Unkn	PEITC(post 30)5	27.49	19.3157
H06	SYBR	IFN-r	Unkn	PEITC(post 30)5	27.4539	19.0905	27.4597	19.2202	8.23947		-4.21851	18.6165

## Sheet: Actin2
File Name	admin_2019-10-20 15-53-38_BR002355.pcrd
Created By User	admin
Notes
ID
Run Started	10/20/2019 07:53:48 UTC
Run Ended	10/20/2019 09:10:03 UTC
Sample Vol	10
Lid Temp	105
Protocol File Name	120109-IQmelt curve.prcl
Plate Setup File Name	20191014.pltd
Base Serial Number	BR002355
Optical Head Serial Number	788BR02281
CFX Manager Version	3.1.1517.0823.
Well group	All Wells
Amplification step	3
Melt step	5
Well	Fluor	Target	Content	Sample	Cq	Starting Quantity (SQ)
A04	SYBR	Actin	Unkn	N1	20.11
A05	SYBR	Actin	Unkn	N1	20.0437
A06	SYBR	Actin	Unkn	N1	19.9384
A07	SYBR	Actin	Unkn	N2	22.2938
A08	SYBR	Actin	Unkn	N2	22.1283
A09	SYBR	Actin	Unkn	N2	22.1783
A10	SYBR	Actin	Unkn	N3	22.0205
A11	SYBR	Actin	Unkn	N3	22.0099
A12	SYBR	Actin	Unkn	N3	22.2569
B01	SYBR	Actin	Unkn	N4	21.3527
B02	SYBR	Actin	Unkn	N4	21.217
B03	SYBR	Actin	Unkn	N4	21.3735
B04	SYBR	Actin	Unkn	M1	22.6072
B05	SYBR	Actin	Unkn	M1	22.4621
B06	SYBR	Actin	Unkn	M1	22.3029
B07	SYBR	Actin	Unkn	M2	19.132
B08	SYBR	Actin	Unkn	M2	19.0969
B09	SYBR	Actin	Unkn	M2	18.9486
B10	SYBR	Actin	Unkn	M3	19.8872
B11	SYBR	Actin	Unkn	M3	20.0154
B12	SYBR	Actin	Unkn	M3	19.8003
C01	SYBR	Actin	Unkn	M4	20.1893
C02	SYBR	Actin	Unkn	M4	20.1959
C03	SYBR	Actin	Unkn	M4	20.1552
C04	SYBR	Actin	Unkn	M5	21.0188
C05	SYBR	Actin	Unkn	M5	20.7695
C06	SYBR	Actin	Unkn	M5	20.6754
C07	SYBR	Actin	Unkn	PEITC(pre 7.5) 1	19.0113
C08	SYBR	Actin	Unkn	PEITC(pre 7.5) 1	19.0082
C09	SYBR	Actin	Unkn	PEITC(pre 7.5) 1	19.1057
C10	SYBR	Actin	Unkn	PEITC(pre 7.5)2	19.0826
C11	SYBR	Actin	Unkn	PEITC(pre 7.5)2	19.1749
C12	SYBR	Actin	Unkn	PEITC(pre 7.5)2	19.1676
D01	SYBR	Actin	Unkn	PEITC(pre 7.5)3	19.3301
D02	SYBR	Actin	Unkn	PEITC(pre 7.5)3	19.2484
D03	SYBR	Actin	Unkn	PEITC(pre 7.5)3	19.2526
D04	SYBR	Actin	Unkn	PEITC(pre 7.5)4	20.2003
D05	SYBR	Actin	Unkn	PEITC(pre 7.5)4	20.0164
D06	SYBR	Actin	Unkn	PEITC(pre 7.5)4	20.0351
D07	SYBR	Actin	Unkn	PEITC(pre 7.5)5	20.3669
D08	SYBR	Actin	Unkn	PEITC(pre 7.5)5	20.4391
D09	SYBR	Actin	Unkn	PEITC(pre 7.5)5	20.5881
D10	SYBR	Actin	Unkn	PEITC(pre 15)1	19.6372
D11	SYBR	Actin	Unkn	PEITC(pre 15)1	19.6434
D12	SYBR	Actin	Unkn	PEITC(pre 15)1	19.7535
E01	SYBR	Actin	Unkn	PEITC(pre 15)2	19.3994
E02	SYBR	Actin	Unkn	PEITC(pre 15)2	19.1612
E03	SYBR	Actin	Unkn	PEITC(pre 15)2	19.1978
E04	SYBR	Actin	Unkn	PEITC(pre 15)3	18.754
E05	SYBR	Actin	Unkn	PEITC(pre 15)3	18.6057
E06	SYBR	Actin	Unkn	PEITC(pre 15)3	18.5599
E07	SYBR	Actin	Unkn	PEITC(pre 15)4	21.0112
E08	SYBR	Actin	Unkn	PEITC(pre 15)4	20.8542
E09	SYBR	Actin	Unkn	PEITC(pre 15)4	21.1374
E10	SYBR	Actin	Unkn	PEITC(pre 15)5	20.4271
E11	SYBR	Actin	Unkn	PEITC(pre 15)5	20.4744
E12	SYBR	Actin	Unkn	PEITC(pre 15)5	20.6929
F01	SYBR	Actin	Unkn	PEITC(pre 30)1	20.4723
F02	SYBR	Actin	Unkn	PEITC(pre 30)1	20.6872
F03	SYBR	Actin	Unkn	PEITC(pre 30)1	20.3764
F04	SYBR	Actin	Unkn	PEITC(pre 30)2	19.992
F05	SYBR	Actin	Unkn	PEITC(pre 30)2	19.8202
F06	SYBR	Actin	Unkn	PEITC(pre 30)2	19.8708
F07	SYBR	Actin	Unkn	PEITC(pre 30)3	19.7572
F08	SYBR	Actin	Unkn	PEITC(pre 30)3	20.0091
F09	SYBR	Actin	Unkn	PEITC(pre 30)3	20.0077
F10	SYBR	Actin	Unkn	PEITC(pre 30)4	19.7109
F11	SYBR	Actin	Unkn	PEITC(pre 30)4	19.6692
F12	SYBR	Actin	Unkn	PEITC(pre 30)4	19.8001
G01	SYBR	Actin	Unkn	PEITC(pre 30)5	21.5194
G02	SYBR	Actin	Unkn	PEITC(pre 30)5	21.5358
G03	SYBR	Actin	Unkn	PEITC(pre 30)5	21.3403
G04	SYBR	Actin	Unkn	PEITC(post 30)1	20.0101
G05	SYBR	Actin	Unkn	PEITC(post 30)1	19.8454
G06	SYBR	Actin	Unkn	PEITC(post 30)1	20.0035
G07	SYBR	Actin	Unkn	PEITC(post 30)2	19.0561
G08	SYBR	Actin	Unkn	PEITC(post 30)2	19.2746
G09	SYBR	Actin	Unkn	PEITC(post 30)2	19.2854
G10	SYBR	Actin	Unkn	PEITC(post 30)3	19.2999
G11	SYBR	Actin	Unkn	PEITC(post 30)3	19.4511
G12	SYBR	Actin	Unkn	PEITC(post 30)3	19.5745
H01	SYBR	Actin	Unkn	PEITC(post 30)4	19.7006
H02	SYBR	Actin	Unkn	PEITC(post 30)4	19.6116
H03	SYBR	Actin	Unkn	PEITC(post 30)4	19.3492
H04	SYBR	Actin	Unkn	PEITC(post 30)5	19.6555
H05	SYBR	Actin	Unkn	PEITC(post 30)5	19.5683
H06	SYBR	Actin	Unkn	PEITC(post 30)5	19.5382

## Sheet: CXCL10
File Name	admin_2019-10-20 21-52-35_BR002355.pcrd
Created By User	admin
Notes
ID
Run Started	10/20/2019 13:52:45 UTC
Run Ended	10/20/2019 15:07:40 UTC
Sample Vol	10
Lid Temp	105
Protocol File Name	120109-IQmelt curve.prcl
Plate Setup File Name	20191014.pltd
Base Serial Number	BR002355
Optical Head Serial Number	788BR02281
CFX Manager Version	3.1.1517.0823.
Well group	All Wells
Amplification step	3
Melt step	5
Well	Fluor	Target	Content	Sample	Cq	Starting Quantity (SQ)
A04	SYBR	CXCL10	Unkn	N1	28.9271	20.11
A05	SYBR	CXCL10	Unkn	N1	28.6282	20.0437
A06	SYBR	CXCL10	Unkn	N1	28.3304	19.9384	28.6285	20.0307	8.59784
A07	SYBR	CXCL10	Unkn	N2	29.3184	22.2938
A08	SYBR	CXCL10	Unkn	N2		22.1283
A09	SYBR	CXCL10	Unkn	N2	29.3669	22.1783	29.3427	22.2001	7.14255
A10	SYBR	CXCL10	Unkn	N3	29.1546	22.0205
A11	SYBR	CXCL10	Unkn	N3	29.0081	22.0099
A12	SYBR	CXCL10	Unkn	N3	29.4757	22.2569	29.2128	22.0958	7.11705
B01	SYBR	CXCL10	Unkn	N4	29.2013	21.3527
B02	SYBR	CXCL10	Unkn	N4	29.1167	21.217
B03	SYBR	CXCL10	Unkn	N4	29.2549	21.3735	29.191	21.3144	7.87658	7.6835	1
B04	SYBR	CXCL10	Unkn	M1	22.6774	22.6072
B05	SYBR	CXCL10	Unkn	M1		22.4621
B06	SYBR	CXCL10	Unkn	M1	22.7276	22.3029	22.7025	22.4574	0.245133	-7.43837	173.449
B07	SYBR	CXCL10	Unkn	M2	18.4878	19.132
B08	SYBR	CXCL10	Unkn	M2	18.353	19.0969
B09	SYBR	CXCL10	Unkn	M2	18.6724	18.9486	18.5044	19.0592	-0.554788	-8.23829	301.976
B10	SYBR	CXCL10	Unkn	M3	19.6222	19.8872
B11	SYBR	CXCL10	Unkn	M3	19.4059	20.0154
B12	SYBR	CXCL10	Unkn	M3	19.8692	19.8003	19.6324	19.901	-0.268561	-7.95206	247.634
C01	SYBR	CXCL10	Unkn	M4	22.5313	20.1893
C02	SYBR	CXCL10	Unkn	M4	22.7127	20.1959
C03	SYBR	CXCL10	Unkn	M4	22.6075	20.1552	22.6172	20.1802	2.43702	-5.24649	37.962
C04	SYBR	CXCL10	Unkn	M5	23.217	21.0188
C05	SYBR	CXCL10	Unkn	M5	22.9748	20.7695
C06	SYBR	CXCL10	Unkn	M5	22.8154	20.6754	23.0024	20.8212	2.18119	-5.50232	45.3276
C07	SYBR	CXCL10	Unkn	PEITC(pre 7.5) 1	20.0798	19.0113
C08	SYBR	CXCL10	Unkn	PEITC(pre 7.5) 1	19.9693	19.0082
C09	SYBR	CXCL10	Unkn	PEITC(pre 7.5) 1	20.0406	19.1057	20.0299	19.0417	0.988155	-6.69535	103.634
C10	SYBR	CXCL10	Unkn	PEITC(pre 7.5)2	20.3114	19.0826
C11	SYBR	CXCL10	Unkn	PEITC(pre 7.5)2	20.278	19.1749
C12	SYBR	CXCL10	Unkn	PEITC(pre 7.5)2	20.3549	19.1676	20.3148	19.1417	1.17305	-6.51045	91.1679
D01	SYBR	CXCL10	Unkn	PEITC(pre 7.5)3	18.9609	19.3301
D02	SYBR	CXCL10	Unkn	PEITC(pre 7.5)3	19.4091	19.2484
D03	SYBR	CXCL10	Unkn	PEITC(pre 7.5)3	19.2507	19.2526	19.2069	19.277	-0.0701251	-7.75363	215.812
D04	SYBR	CXCL10	Unkn	PEITC(pre 7.5)4	20.2425	20.2003
D05	SYBR	CXCL10	Unkn	PEITC(pre 7.5)4	20.2557	20.0164
D06	SYBR	CXCL10	Unkn	PEITC(pre 7.5)4	20.2219	20.0351	20.24	20.0839	0.156092	-7.52741	184.492
D07	SYBR	CXCL10	Unkn	PEITC(pre 7.5)5	22.0595	20.3669
D08	SYBR	CXCL10	Unkn	PEITC(pre 7.5)5	22.1347	20.4391
D09	SYBR	CXCL10	Unkn	PEITC(pre 7.5)5	22.241	20.5881	22.1451	20.4647	1.68037	-6.00314	64.1392
D10	SYBR	CXCL10	Unkn	PEITC(pre 15)1	20.2243	19.6372
D11	SYBR	CXCL10	Unkn	PEITC(pre 15)1	20.0596	19.6434
D12	SYBR	CXCL10	Unkn	PEITC(pre 15)1	20.381	19.7535	20.2216	19.678	0.543635	-7.13987	141.031
E01	SYBR	CXCL10	Unkn	PEITC(pre 15)2	19.0229	19.3994
E02	SYBR	CXCL10	Unkn	PEITC(pre 15)2	19.0172	19.1612
E03	SYBR	CXCL10	Unkn	PEITC(pre 15)2	19.0541	19.1978	19.0314	19.2528	-0.221379	-7.90488	239.666
E04	SYBR	CXCL10	Unkn	PEITC(pre 15)3	18.4373	18.754
E05	SYBR	CXCL10	Unkn	PEITC(pre 15)3	18.6531	18.6057
E06	SYBR	CXCL10	Unkn	PEITC(pre 15)3	18.129	18.5599	18.4065	18.6399	-0.233375	-7.91688	241.667
E07	SYBR	CXCL10	Unkn	PEITC(pre 15)4	22.012	21.0112
E08	SYBR	CXCL10	Unkn	PEITC(pre 15)4	21.9511	20.8542
E09	SYBR	CXCL10	Unkn	PEITC(pre 15)4	22.3092	21.1374	22.0908	21.0009	1.08984	-6.59366	96.5805
E10	SYBR	CXCL10	Unkn	PEITC(pre 15)5	23.2832	20.4271
E11	SYBR	CXCL10	Unkn	PEITC(pre 15)5	23.4284	20.4744
E12	SYBR	CXCL10	Unkn	PEITC(pre 15)5	23.7521	20.6929	23.4879	20.5315	2.95643	-4.72707	26.4844
F01	SYBR	CXCL10	Unkn	PEITC(pre 30)1	21.7575	20.4723
F02	SYBR	CXCL10	Unkn	PEITC(pre 30)1	21.6985	20.6872
F03	SYBR	CXCL10	Unkn	PEITC(pre 30)1	21.6767	20.3764	21.7109	20.512	1.19889	-6.48461	89.5493
F04	SYBR	CXCL10	Unkn	PEITC(pre 30)2	21.3614	19.992
F05	SYBR	CXCL10	Unkn	PEITC(pre 30)2	21.5257	19.8202
F06	SYBR	CXCL10	Unkn	PEITC(pre 30)2	21.8555	19.8708	21.5809	19.8943	1.68654	-5.99696	63.8653
F07	SYBR	CXCL10	Unkn	PEITC(pre 30)3	20.5221	19.7572
F08	SYBR	CXCL10	Unkn	PEITC(pre 30)3	20.465	20.0091
F09	SYBR	CXCL10	Unkn	PEITC(pre 30)3	20.7194	20.0077	20.5689	19.9247	0.644186	-7.03932	131.536
F10	SYBR	CXCL10	Unkn	PEITC(pre 30)4		19.7109
F11	SYBR	CXCL10	Unkn	PEITC(pre 30)4	21.5684	19.6692
F12	SYBR	CXCL10	Unkn	PEITC(pre 30)4	21.6166	19.8001	21.5925	19.7267	1.86579	-5.81771	56.4034
G01	SYBR	CXCL10	Unkn	PEITC(pre 30)5	22.6112	21.5194
G02	SYBR	CXCL10	Unkn	PEITC(pre 30)5	22.2753	21.5358
G03	SYBR	CXCL10	Unkn	PEITC(pre 30)5	22.4628	21.3403	22.4498	21.4651	0.984613	-6.69889	103.888
G04	SYBR	CXCL10	Unkn	PEITC(post 30)1	21.1615	20.0101
G05	SYBR	CXCL10	Unkn	PEITC(post 30)1	21.1369	19.8454
G06	SYBR	CXCL10	Unkn	PEITC(post 30)1	21.4957	20.0035	21.2647	19.953	1.31172	-6.37179	82.8131
G07	SYBR	CXCL10	Unkn	PEITC(post 30)2	21.2764	19.0561
G08	SYBR	CXCL10	Unkn	PEITC(post 30)2	21.1337	19.2746
G09	SYBR	CXCL10	Unkn	PEITC(post 30)2	21.1919	19.2854	21.2007	19.2054	1.99529	-5.68821	51.561
G10	SYBR	CXCL10	Unkn	PEITC(post 30)3	21.5556	19.2999
G11	SYBR	CXCL10	Unkn	PEITC(post 30)3	21.6988	19.4511
G12	SYBR	CXCL10	Unkn	PEITC(post 30)3	21.4486	19.5745	21.5677	19.4419	2.12581	-5.55769	47.1012
H01	SYBR	CXCL10	Unkn	PEITC(post 30)4	22.5359	19.7006
H02	SYBR	CXCL10	Unkn	PEITC(post 30)4	22.1951	19.6116
H03	SYBR	CXCL10	Unkn	PEITC(post 30)4	22.236	19.3492	22.3223	19.5538	2.76852	-4.91499	30.1689
H04	SYBR	CXCL10	Unkn	PEITC(post 30)5	20.9586	19.6555
H05	SYBR	CXCL10	Unkn	PEITC(post 30)5	21.2834	19.5683
H06	SYBR	CXCL10	Unkn	PEITC(post 30)5	20.9055	19.5382	21.0492	19.5873	1.46185	-6.22165	74.6284
