# Supplementary material for: Direct Inhibition of GSDMD by PEITC Reduces Hepatocyte Pyroptosis and Alleviates Acute Liver Injury in Mice
Source: Frontiers journal article supplement (doi:10.3389/fimmu.2022.825428), 2022-01-31
Supplement: Presentation_1.zip [file Figure 3A (Representative WB).docx]

Pro CASP1:





Cleaved CASP1:





GSDMD GSDMD-N:
