# Supplementary material for: Direct Inhibition of GSDMD by PEITC Reduces Hepatocyte Pyroptosis and Alleviates Acute Liver Injury in Mice
Source: Frontiers journal article supplement (doi:10.3389/fimmu.2022.825428), 2022-01-31
Supplement: Presentation_1.zip [file Figure 3B.xlsx]

## Sheet: gray-scale value
	NLRP3	pro CASP	CASP	G	GN	A
0	3486.41	3977.94	198.142	3700.41	1335.7	9746.65
0	2728.23	1845.7	1052.11	4948.82	2332.7	10057.1
4	7123.53	9514.94	8296.23	5020.58	2268.11	9798.7
4	5172.53	8132.65	6711.35	4776.41	4262.23	9932.28
4	7335.82	9870.23	7279.11	5239.53	7947.23	8877.11
8	6058.94	3016.7	3608.53	7250.46	6549.41	9517.7
8	9814.65	5830.82	5082.82	10397.8	8118.23	9474.53
8	6641.53	4587.53	7422.94	9164.58	10080.2	9621.41
12	5679.94	6941.7	3930.53	12151.1	6122.41	11585.5
12	5301.94	3297.58	3621.11	8525.87	5148.53	11262.5
12	7489.53	7288.23	5051.77	10148.1	5020.23	10502
16	5711.53	2391.41	1821.63	12212.6	6629.35	11981.2
16	4288.94	975.163	2275.99	9868.41	3994.41	10381
16	4438.41	3878.23	3093.65	10560.5	2210.46	12854.1
time(h)	0	4	8	12	16		time(h)	0	4	8	12	16
		7123.53	6058.94	5679.94	5711.53				8296.23	3608.53	3930.53	1821.63
N	3486.41	5172.53	9814.65	5301.94	4288.94		C	198.142	6711.35	5082.82	3621.11	2275.99
	2728.23	7335.82	6641.53	7489.53	4438.41			1052.11	7279.11	7422.94	5051.77	3093.65
A	9746.65	9798.7	9517.7	11585.5	11981.2		PC	3977.94	9514.94	3016.7	6941.7	2391.41
	10057.1	9932.28	9474.53	11262.5	10381			1845.7	8132.65	5830.82	3297.58	975.163
		8877.11	9621.41	10502	12854.1				9870.23	4587.53	7288.23	3878.23
	9901.88	9536.03	9537.88	11116.7	11738.8			2911.82	9172.61	4478.35	5842.5	2414.93
	0.352095	0.747012	0.63525	0.510939	0.486552			0.0680475	0.904458	0.805772	0.672747	0.754317
	0.275527	0.542419	1.02902	0.476936	0.365365			0.361325	0.731674	1.13498	0.619788	0.942465
		0.769274	0.696332	0.67372	0.378098				0.793571	1.65752	0.864659	1.28105
	0.313811							0.214686
	1.122	2.38045	2.02431	1.62817	1.55046			0.316963	4.21293	3.75325	3.13363	3.51358
	0.878002	1.72849	3.2791	1.51982	1.16428			1.68304	3.40811	5.28668	2.88695	4.38997
		2.45139	2.21895	2.1469	1.20486				3.69642	7.72065	4.02755	5.96707
time(h)	0	4	8	12	16
		2268.11	6549.41	6122.41	6629.35
GN	1335.7	4262.23	8118.23	5148.53	3994.41
	2332.7	7947.23	10080.2	5020.23	2210.46
G	3700.41	5020.58	7250.46	12151.1	12212.6
	4948.82	4776.41	10397.8	8525.87	9868.41
		5239.53	9164.58	10148.1	10560.5
	4324.61	5012.17	8937.62	10275	10880.5
	0.30886	0.452521	0.732791	0.595853	0.609286
	0.5394	0.850377	0.908322	0.501072	0.367115
		1.58559	1.12784	0.488586	0.203157
	0.42413
	0.728219	1.06694	1.72775	1.40488	1.43656
	1.27178	2.00499	2.14161	1.18141	0.865572
		3.73845	2.65919	1.15197	0.478997
