# Supplementary material for: Direct Inhibition of GSDMD by PEITC Reduces Hepatocyte Pyroptosis and Alleviates Acute Liver Injury in Mice
Source: Frontiers journal article supplement (doi:10.3389/fimmu.2022.825428), 2022-01-31
Supplement: Presentation_1.zip [file Figure 3C.xlsx]

## Sheet: Sheet1
IL-1β
		OD	(pg/ml)
Normal	1	0.079	19.7636
	2	0.088	22.029
	3	0.091	22.7914
Model 4h	1	0.132	33.5774
	2	0.122	30.8837
	3	0.139	35.4871
Model 8h	1	0.183	47.9464
	2	0.128	32.495
	3	0.122	30.8837
Model 12h	1	0.098	24.5846
	2	0.12	30.3499
	3	0.14	35.7615
Model 16h	1	0.095	23.8137
	2	0.093	23.3017
	3	0.126	31.9563
