# Supplementary material for: Direct Inhibition of GSDMD by PEITC Reduces Hepatocyte Pyroptosis and Alleviates Acute Liver Injury in Mice
Source: Frontiers journal article supplement (doi:10.3389/fimmu.2022.825428), 2022-01-31
Supplement: Presentation_1.zip [file Figure 3E.xlsx]

## Sheet: gray-scale value
NLRP3	pro CASP	CASP	G	GN	A
5426.77	12348.3	4646.82	11569.3	10493.6	11448.5
6198.65	7467.11	508.335	12250.4	9367.77	12273.5
12194.9	11315.1	10818.9	11440.1	11543.3	14975.1
11277.5	11282.1	6302.65	11880.6	5844.23	14552.8
11048.2	10018.2	5797.48	10068.5	1758.53	13152.1
6766.77	10718.4	2933.65	9977.35	7966.77	13875.6
10113.1	10854.5	4138.89	12054.5	11080.2	14218.4
6250.65	10223.5	3452.01	12280.5	8453.89	14335
8026.77	6478.77	1872.82	9350.77	5107.06	13511.8
10868.6	7460.23	1104.8	9790.65	6791.18	11038.2
8537.06	9145.48	2046.23	8332.06	10220.4	13768.6
8551.6	9646.18	2280.18	8018.18	4669.06	13709.6
	n	m	peitc(pre) 7.5	peitc(pre) 15	peitc(pre) 30	peitc(post) 30			n	m	peitc(pre) 7.5	peitc(pre) 15	peitc(pre) 30	peitc(post) 30
N	5426.77	12194.9	11048.2	10113.1	8026.77	8537.06		C	4646.82	10818.9	5797.48	4138.89	1872.82	2046.23
	6198.65	11277.5	6766.77	6250.65	10868.6	8551.6			508.335	6302.65	2933.65	3452.01	1104.8	2280.18
A	11448.5	14975.1	13152.1	14218.4	13511.8	13768.6		PC	12348.3	11315.1	10018.2	10854.5	6478.77	9145.48
	12273.5	14552.8	13875.6	14335	11038.2	13709.6			7467.11	11282.1	10718.4	10223.5	7460.23	9646.18
	11861	14764	13513.9	14276.7	12275	13739.1			9907.71	11298.6	10368.3	10539	6969.5	9395.83
	0.45753	0.82599	0.817543	0.708363	0.653911	0.621368			0.469011	0.957548	0.559154	0.392722	0.268716	0.217781
	0.522607	0.763851	0.500727	0.437822	0.885424	0.622426			0.051307	0.557826	0.282944	0.327547	0.158519	0.24268
	0.490069								0.260159
	0.933604	1.68546	1.66822	1.44543	1.33432	1.26792			1.80279	3.68063	2.14928	1.50955	1.03289	0.837108
	1.0664	1.55866	1.02175	0.893389	1.80673	1.27008			0.197214	2.14418	1.08758	1.25903	0.609317	0.932817
	1	1.62206	1.34498	1.16941	1.57053	1.269			1	2.9124	1.61843	1.38429	0.821105	0.884962
	n	m	peitc(pre) 7.5	peitc(pre) 15	peitc(pre) 30	peitc(post) 30
GN	10493.6	11543.3	1758.53	11080.2	5107.06	10220.4
	9367.77	5844.23	7966.77	8453.89	6791.18	4669.06
G	11569.3	11440.1	10068.5	12054.5	9350.77	8332.06
	12250.4	11880.6	9977.35	12280.5	9790.65	8018.18
	11909.8	11660.4	10022.9	12167.5	9570.71	8175.12
	0.881087	0.989962	0.175451	0.910639	0.533614	1.25018
	0.786558	0.501205	0.794856	0.694794	0.70958	0.57113
	0.833822
	1.05668	1.18726	0.210417	1.09213	0.639961	1.49933
	0.943316	0.601094	0.953267	0.833264	0.850997	0.684955
	1	0.894175	0.581842	0.962695	0.745479	1.09214
