# Supplementary material for: Direct Inhibition of GSDMD by PEITC Reduces Hepatocyte Pyroptosis and Alleviates Acute Liver Injury in Mice
Source: Frontiers journal article supplement (doi:10.3389/fimmu.2022.825428), 2022-01-31
Supplement: Presentation_1.zip [file Figure 4E.xlsx]

## Sheet: NLRP3
NLRP3	AOD(Average Optical Density)=INTD/AREA
Normal	AREA	INTD		AOD
1	373109	71573.3		0.19183
2	365117	70102.5		0.192
3	363858	68769.2		0.189
Model
1	25156	5928.29		0.235661
2	18907	4705.06		0.248853
3	29551	6608.61		0.223634
PEITC(pre) 7.5
1	6863	1487.48		0.216739
2	14802	3498.56		0.236357
4	8399	1871.36		0.222808
PEITC(pre) 15
1	4863	942.556		0.193822
3	5577	1067.9		0.191483
4	6387	1213.53		0.19
PEITC(pre) 30
1	28	5.089		0.18175
2	5508	1013.2		0.18395
3	308674	59837.5		0.193853
PEITC(post) 30
1	1907	357.749		0.187598
2	36888	7208.1		0.195405
3	2646	476.28		0.18

## Sheet: GSDMD
GSDMD
Normal	AREA	INTD		AOD
1	56767	17080.1		0.30088
4	30213	11742		0.38864
5	235032	71658.6		0.304889
Model
5	147300	53672.7		0.364377
6	91105	33992.3		0.373111
4	48482	18704.1		0.385795
PEITC(pre) 7.5
1	9376	3629.13		0.387066
2	18019	7415.31		0.411527
3	11112	4288.44		0.385928
PEITC(pre) 15
4	16788	6021.27		0.358665
5	20373	7250.81		0.355903
6	97282	31924.6		0.328166
PEITC(pre) 30
1	287898	87133.4		0.302654
2	66381	20528.8		0.309257
3	128739	41561.1		0.322832
PEITC(post) 30
1	178931	56440.2		0.31543
2	224325	70553.9		0.314517
3	93916	28589.6		0.304417

## Sheet: IL-1beta
IL-1beta
Normal	AREA	INTD	AOD
1	403785	74916.7	0.185536
2	417405	77122.5	0.184767
3	442075	81987.9	0.185462
Model
1	108367	24210.6	0.223413
2	87545	19717	0.225222
3	137126	29248.4	0.213296
PEITC(pre) 7.5
1	136052	27569.9	0.202643
2	122821	24998.4	0.203536
3	91622	19160.6	0.209127
PEITC(pre) 15
1	136244	28969.2	0.212627
2	75206	15828.1	0.210463
3	164395	32965.5	0.200526
PEITC(pre) 30
1	325189	64384.1	0.19799
2	305269	59930.9	0.196321
3	309045	60728.2	0.196503
PEITC(post) 30
1	322188	61572.6	0.191108
2	356337	65803.7	0.184667
3	392837	72899.8	0.185573

## Sheet: CASP1
CASP1
Normal	AREA	INTD		AOD
1	602080	171187		0.284327
2	576415	162459		0.281844
3	597637	169297		0.283278
Model
3	706889	237377		0.335806
4	670256	216468		0.322964
5	604238	204891		0.339091
PEITC(pre) 7.5
6	694806	214608		0.308875
7	875423	263091		0.30053
9	567587	170737		0.300812
PEITC(pre) 15
1	843241	251804		0.298614
2	528593	151767		0.287115
3	652749	194879		0.298551
PEITC(pre) 30
1	598494	176065		0.294181
2	579272	172979		0.298614
3	638467	189488		0.296785
PEITC(post) 30
1	2	0.616		0.308
2	725971	213976		0.294745
3	63289	18849.5		0.297833
