# Supplementary material for: Direct Inhibition of GSDMD by PEITC Reduces Hepatocyte Pyroptosis and Alleviates Acute Liver Injury in Mice
Source: Frontiers journal article supplement (doi:10.3389/fimmu.2022.825428), 2022-01-31
Supplement: Presentation_1.zip [file Figure 6C (relative band intensity).xlsx]

## Sheet: Sheet1
NLRP3		PRO CASP		C CASP		GSDMD		GSDMD N		Ac
5085.64	5226.88	21813.3	21701.5	412.021	459.728	18170.1	17931.1	11545.2	11466.2	24905.1	25085.2
22597.6	22650.6	25360.4	25538.1	23637	23687.3	22299.8	21998.3	15863.7	15740	26466.1	26639.7
22177.2	22146.2	21786.6	22003.9	21367.3	21397.9	22548.6	22240.6	17691	17579.6	21707.6	21826.9
12900.2	12882.5	21983.1	22089.5	16829.7	16978.1	24259.3	23939	5120.76	5083.47	18937.6	19059.3
12654	12684.7	15014.7	15035.5	1047.97	1008.43	23557.8	23204.4	2432.57	2405.15	21632.2	21859.2
NLRP3	5085.64	22597.6	22177.2	12900.2	12654		C CASP	412.021	23637	21367.3	16829.7	1047.97
	5226.88	22650.6	22146.2	12882.5	12684.7			459.728	23687.3	21397.9	16978.1	1008.43
Ac	24905.1	26466.1	21707.6	18937.6	21632.2		PRO CASP	21813.3	25360.4	21786.6	21983.1	15014.7
	25085.2	26639.7	21826.9	19059.3	21859.2			21701.5	25538.1	22003.9	22089.5	15035.5
	24995.1	26552.9	21767.3	18998.5	21745.7			21757.4	25449.2	21895.2	22036.3	15025.1
	0.203465	0.85104	1.01883	0.679013	0.581909			0.018937	0.92879	0.975889	0.763723	0.0697479
	0.209116	0.853036	1.01741	0.678081	0.583321			0.0211297	0.930766	0.977286	0.770458	0.0671166
	0.206291							0.0200334
	0.986304	4.12544	4.93882	3.29153	2.82082			0.945274	46.3621	48.7131	38.1225	3.48158
	1.0137	4.13512	4.93192	3.28702	2.82767			1.05473	46.4607	48.7829	38.4587	3.35024
	1	4.13028	4.93537	3.28928	2.82424			1	46.4114	48.748	38.2906	3.41591
GSDMD N	11545.2	15863.7	17691	5120.76	2432.57
	11466.2	15740	17579.6	5083.47	2405.15
GSDMD	18170.1	22299.8	22548.6	24259.3	23557.8
	17931.1	21998.3	22240.6	23939	23204.4
	18050.6	22149	22394.6	24099.2	23381.1
	0.639605	0.716227	0.78997	0.212487	0.10404
	0.635229	0.710642	0.784995	0.21094	0.102868
	0.637417
	1.00343	1.12364	1.23933	0.333356	0.163221
	0.996567	1.11488	1.23152	0.330929	0.161382
	1	1.11926	1.23543	0.332142	0.162302
