# Supplementary material for: Direct Inhibition of GSDMD by PEITC Reduces Hepatocyte Pyroptosis and Alleviates Acute Liver Injury in Mice
Source: Frontiers journal article supplement (doi:10.3389/fimmu.2022.825428), 2022-01-31
Supplement: Presentation_1.zip [file Figure 7A (relative band intensity).xlsx]

## Sheet: gray-scale value
DMSO
GSDMD	15809.2	13735.7	15518.5	14748.2	14499.9	15043.9	13802.9	11161.7	2642.99	209.314
	15944.3	13903.6	15673.8	14887	14587.7	15153.8	13813.4	11210.2	2642.43	214.314
	15674	13567.9	15363.1	14609.4	14412.1	14934.1	13792.3	11113.2	2643.55	204.314
tubulin	15205.6	16233.9	15004.5	16079.8	17296.6	15921.8	15320.1	14115.6	13972.7	82289.9
	15388.2	16504.2	15156.8	16169.1	17326.4	16215.1	15358.6	14123.7	14043.4	8219.23
	15296.9	16369.1	15080.6	16124.4	17311.5	16068.5	15339.4	14119.7	14008.1	45254.6
	1.04232	0.849381	1.03934	0.923256	0.842661	0.943075	0.900521	0.793943	0.188636	0.00473574
	1.02465	0.828873	1.01873	0.906041	0.832518	0.929402	0.899144	0.787073	0.188716	0.00451477
	1.03349	0.839127	1.02903	0.914648	0.837589	0.936238	0.899833	0.790508	0.188676	0.00462526
	1.03349
relative band intensity	1.00855	0.821858	1.00566	0.893338	0.815355	0.912515	0.87134	0.768216	0.182523	0.00458228
	0.991451	0.802014	0.985722	0.876681	0.805541	0.899285	0.870008	0.761569	0.182601	0.00436847
	1	0.811936	0.99569	0.88501	0.810448	0.9059	0.870674	0.764892	0.182562	0.00447538
PEITC
GSDMD	13200	14820.2	14283.8	12781.3	13529	12745.3	5140.46	3719.49	367.288	171.753
	13211.8	14821.7	14286.3	12777.3	13518	12745.3	5149.67	3713.84	356.728	178.607
	13188.1	14818.7	14281.3	12785.3	13540	12745.3	5131.26	3725.13	377.849	164.899
tubulin	12263.1	21657.6	15694.6	14580.8	15840.5	13443.9	15556.9	11580.7	11316.4	89501.4
	11931.6	21735	15926.6	14563.4	15906.5	13469.6	15581.8	11706.7	11426.4	8527.55
	12097.4	21696.3	15810.6	14572.1	15873.5	13456.7	15569.3	11643.7	11371.4	49014.5
	1.09213	0.683142	0.903587	0.876832	0.851603	0.947128	0.330757	0.318957	0.0313706	0.00364396
	1.09017	0.683004	0.903271	0.877381	0.852989	0.947128	0.329575	0.319926	0.0332279	0.00336429
	1.09115	0.683073	0.903429	0.877107	0.852296	0.947128	0.330166	0.319442	0.0322992	0.00350413
	1.09115
relative band intensity	1.0009	0.626077	0.828108	0.803588	0.780466	0.868011	0.303128	0.292313	0.0287501	0.00333957
	0.999102	0.62595	0.827818	0.804091	0.781736	0.868011	0.302044	0.293202	0.0304523	0.00308326
	1	0.626014	0.827963	0.80384	0.781101	0.868011	0.302586	0.292758	0.0296012	0.00321142
