# Supplementary material for: Direct Inhibition of GSDMD by PEITC Reduces Hepatocyte Pyroptosis and Alleviates Acute Liver Injury in Mice
Source: Frontiers journal article supplement (doi:10.3389/fimmu.2022.825428), 2022-01-31
Supplement: Presentation_1.zip [file Figure 7C.xls]

## Sheet: Sheet1
LDH
control	0.047		0.036
standard	0.083
nc	0.2002	0.182	0.0182	101.111	72.2222	1.4
	0.1898	0.182	0.0078	43.3333		0.6
wt	0.203	0.163	0.04	222.222		3.07692
	0.2065	0.163	0.0435	241.667		3.34615
	0.21	0.163	0.047	261.111		3.61538
wt+peitc	0.211	0.191	0.02	111.111		1.53846
	0.2065	0.191	0.0155	86.1111		1.19231
	0.202	0.191	0.011	61.1111		0.846154
wt+nsa	0.211	0.208	0.003	16.6667		0.230769
	0.21095	0.208	0.00295	16.3889		0.226923
	0.2109	0.208	0.0029	16.1111		0.223077
c191a	0.185	0.163	0.022	122.222		1.69231
	0.1849	0.163	0.0219	121.667		1.68462
	0.1848	0.163	0.0218	121.111		1.67692
c191a+peitc	0.234	0.208	0.026	144.444		2
	0.247	0.208	0.039	216.667		3
	0.26	0.208	0.052	288.889		4
c191a+nsa	0.272	0.208	0.064	355.556		4.92308
	0.253	0.208	0.045	250		3.46154
	0.234	0.208	0.026	144.444		2
