# Supplementary material for: Direct Inhibition of GSDMD by PEITC Reduces Hepatocyte Pyroptosis and Alleviates Acute Liver Injury in Mice
Source: Frontiers journal article supplement (doi:10.3389/fimmu.2022.825428), 2022-01-31
Supplement: Presentation_1.zip [file Figures 1D, F.xlsx]

## Sheet: liver index
	liver weight(g)	body weight(g)	liver index			liver weight	body weight	liver index
Normal	1.8616	27.7	0.0672058		Normal	1.8616	34.95	0.0532647
	1.1691	28.6	0.0408776			1.1691	26.2	0.0446221
	1.2186	29.9	0.0407559			1.2186	28.56	0.0426681
	0.8491	29	0.0292793			1.3126	29.56	0.0444046
Model（ConA 10mg/kg）	1.9737	29.4	0.0671327		Model（ConA 10mg/kg）	1.8972	30.86	0.0614776
	2.0807	29.1	0.0715017			1.7174	29.61	0.0580007
	1.9691	28.2	0.0698262			1.7876	27.59	0.0647916
	1.9294	29.4	0.0656259
	1.8736	29.1	0.0643849
peitc(pre)(7.5 mg/kg)	1.8095	27.9	0.0648566		peitc(pre)(7.5 mg/kg)	1.7029	30.28	0.0562384
	1.8967	29.4	0.0645136
	2.085	29.5	0.070678			1.2599	25.05	0.0502954
	1.9974	29	0.0688759			1.7231	31.57	0.0545803
	1.9241	28.3	0.0679894			1.4087	27.41	0.0513937
peitc(pre)(15 mg/kg)	1.9366	27.7	0.0699134		peitc(pre)(15 mg/kg)	1.1914	23.18	0.0513978
	2.0025	28.3	0.0707597
	2.1437	29.7	0.0721785			1.6241	28.84	0.0563141
	1.9353	28.4	0.0681444			1.061	21.9	0.0484475
	2.0689	29.8	0.0694262			1.722	32.45	0.0530663
peitc(pre)(30 mg/kg)	1.9416	28	0.0693429		peitc(pre)(30 mg/kg)	1.61	29.45	0.0546689
	1.7488	29.2	0.0598904			1.8468	33.51	0.0551119
	2.0278	29.8	0.068047			1.5748	27.9	0.0564444
	2.1196	28.5	0.0743719			1.373	26.12	0.0525651
	2.1115	28.8	0.073316			1.6091	28.48	0.0564993
peitc(post)(30 mg/kg)	1.9934	29.1	0.0685017		peitc(post)(30 mg/kg)	1.1742	26.57	0.0441927
	2.0264	28.8	0.0703611			1.8511	31.53	0.0587092
	1.9482	27.9	0.069828			1.6518	30.71	0.053787
	1.9183	29.7	0.0645892			1.1059	22.8	0.0485044
	1.9457	27.9	0.0697384			1.5991	30.35	0.0526886

## Sheet: spleen index
	spleen weight(g)	body weight(g)	spleen index			spleen weight(g)	body weight(g)	spleen index
Normal	0.1	27.7	0.00361011		Normal	0.1261	34.95	0.00360801
	0.173	28.6	0.00604895			0.0799	26.2	0.00304962
	0.1335	29.9	0.00446488			0.0697	28.56	0.00244048
	0.1484	29	0.00511724			0.1193	29.56	0.00403586
Model（ConA 10mg/kg）	0.1847	29.4	0.00628231		Model（ConA 10mg/kg）	0.3432	30.86	0.0111212
	0.1798	29.1	0.00617869			0.3271	29.61	0.0110469
	0.2603	28.2	0.0092305			0.3261	27.59	0.0118195
	0.192	29.4	0.00653061
	0.1623	29.1	0.00557732
peitc(pre)(7.5 mg/kg)	0.1306	27.9	0.004681		peitc(pre)(7.5 mg/kg)	0.1445	30.28	0.00477213
	0.137	29.4	0.00465986
	0.1968	29.5	0.00667119			0.1916	25.05	0.0076487
	0.147	29	0.00506897			0.1945	31.57	0.00616091
	0.1091	28.3	0.00385512			0.2207	27.41	0.00805181
peitc(pre)(15 mg/kg)	0.1316	27.7	0.0047509		peitc(pre)(15 mg/kg)	0.1318	23.18	0.00568594
	0.1436	28.3	0.0050742
	0.1002	29.7	0.00337374			0.1701	28.84	0.00589806
	0.1535	28.4	0.00540493			0.1525	21.9	0.00696347
	0.1255	29.8	0.00421141			0.1954	32.45	0.00602157
peitc(pre)(30 mg/kg)	0.1509	28	0.00538929		peitc(pre)(30 mg/kg)	0.1656	29.45	0.00562309
	0.113	29.2	0.00386986			0.1318	33.51	0.00393315
	0.1544	29.8	0.00518121			0.1103	27.9	0.00395341
	0.14	28.5	0.00491228			0.1359	26.12	0.00520291
	0.1436	28.8	0.00498611			0.1358	28.48	0.00476826
peitc(post)(30 mg/kg)	0.1714	29.1	0.00589003		peitc(post)(30 mg/kg)	0.1319	26.57	0.00496425
	0.1464	28.8	0.00508333			0.191	31.53	0.00605772
	0.1915	27.9	0.0068638			0.1677	30.71	0.00546076
	0.1421	29.7	0.00478451			0.1031	22.8	0.00452193
	0.1395	27.9	0.005			0.2858	30.35	0.0094168
