# Supplementary material for: Direct Inhibition of GSDMD by PEITC Reduces Hepatocyte Pyroptosis and Alleviates Acute Liver Injury in Mice
Source: Frontiers journal article supplement (doi:10.3389/fimmu.2022.825428), 2022-01-31
Supplement: Presentation_1.zip [file Figures 5D, E, F.xlsx]

## Sheet: LDH
	1	2	3	4	5	6	7	8	9	10	11	12
A	0.4	0.375	0.482	0.392	0.427	0.04	0.107	0.107	0.283	0.282	0.14	0.155	450
B	0.305	0.563	0.532	0.386	0.481	0.546	0.393	0.61	0.679	0.443	0.116	0.113	450
C	0.425	0.54	0.335	0.546	0.446	0.303	0.206	0.415	0.254	0.208	0.115	0.117	450
D	0.372	0.609	0.41	0.758	0.421	0.346	0.337	0.435	0.33	0.381	0.145	0.126	450
E	0.517	0.444	0.428	0.671	0.488	0.45	0.47	0.344	0.406	0.396	0.144	0.15	450
F	0.384	0.637	0.382	0.375	0.509	0.578	0.454	0.388	0.496	0.416	0.041	0.038	450
G	0.169	0.303	0.169	0.133	0.165	0.187	0.145	0.143	0.135	0.173	0.04	0.038	450
LDH
	treatment group										control group
	1	2	3	4	5	6	blank group		standard group		11	12
Normal	0.4	0.375		0.482	0.392	0.427	0.107	0.107	0.283	0.282	0.14	0.155
Model（0.2% CCl4）	0.305	0.563	0.532	0.386	0.481	0.546	0.393	0.61	0.679	0.443	0.116	0.113
peitc(pre)(7.5 mg/kg)	0.425	0.54	0.335	0.546	0.446	0.303	0.206	0.415	0.254	0.208	0.115	0.117
peitc(pre)(15 mg/kg)	0.372	0.609	0.41	0.758	0.421	0.346	0.337	0.435	0.33	0.381	0.145	0.126
peitc(pre)(30 mg/kg)	0.517	0.444	0.428	0.671	0.488	0.45	0.47	0.344	0.406	0.396	0.144	0.15
peitc(post)(30 mg/kg)	0.384	0.637	0.382	0.375	0.509	0.578	0.454	0.388	0.496	0.416
control group	0.169	0.303	0.169	0.133	0.165	0.187	0.145	0.143	0.135	0.173
standard group-blank group value	0.1755
Standard concentration	0.2 μmol/ml
average control group value	0.1321
	LDH activity(U/L)=		treatment group-control group value		*	Standard concentration		*	Dilution times	*	1000
			standard group-blank group value
ΔOD
Normal	0.2679	0.2429		0.3499	0.2599	0.2949
Model（0.2% CCl4）	0.1729	0.4309	0.3999	0.2539	0.3489	0.4139	0.2609	0.4779	0.5469	0.3109
peitc(pre)(7.5 mg/kg)	0.2929	0.4079	0.2029	0.4139	0.3139	0.1709	0.0739	0.2829	0.1219	0.0759
peitc(pre)(15 mg/kg)	0.2399		0.2779		0.2889	0.2139	0.2049	0.3029	0.1979	0.2489
peitc(pre)(30 mg/kg)	0.3849	0.3119	0.2959		0.3559	0.3179	0.3379	0.2119	0.2739	0.2639
peitc(post)(30 mg/kg)	0.215	0.334	0.213	0.242	0.344	0.391	0.309	0.245	0.361	0.243
LDH activity(U/L)
Normal	3052.99	2768.09		3987.46	2961.82	3360.68
Model（0.2% CCl4）	19703.7	49105.4	45572.6	28934.5	39760.7	47168.1	29732.2	54461.5	62324.8	35430.2
peitc(pre)(7.5 mg/kg)	33378.9	46484.3	23122.5	47168.1	35772.1	19475.8	8421.65	32239.3	13891.7	8649.57
peitc(pre)(15 mg/kg)	5467.81		6333.9		6584.62	4875.21	4670.09	6903.7	4510.54	5672.93
peitc(pre)(30 mg/kg)	4386.32	3554.42	3372.08		4055.84	3622.79	3850.71	2414.81	3121.37	3007.41
peitc(post)(30 mg/kg)	4900.28	7612.54	4854.7	5515.67	7840.46	8911.68	7042.74	5584.05	8227.92	5538.46

## Sheet: ALT
ALT/GPT
	treatment group										control group
	1	2	3	4	5	6	7	8	9	10	11	12
Normal	0.272	0.2927	0.305	0.3035	0.2884	0.2891					0.2507	0.235
Model（0.2% CCl4）	0.582	0.584	0.5816	0.5925	0.5875	0.5894	0.614	0.5845	0.596	0.6001	0.2471	0.2356
peitc(pre)(7.5 mg/kg)	0.5696	0.5774	0.5684	0.5816	0.5826	0.5715	0.491	0.5815	0.5232	0.3711	0.2342	0.2372
peitc(pre)(15 mg/kg)	0.3014	0.5951	0.3373	0.6229	0.305	0.3248	0.3101	0.4299	0.3704	0.2854	0.2745	0.2365
peitc(pre)(30 mg/kg)	0.2998	0.2967	0.3356		0.3042	0.3168	0.3803	0.2724	0.2804	0.2793	0.2389	0.2514
peitc(post)(30 mg/kg)	0.4327	0.9322	0.405	0.3119	0.4257	0.6473	0.3808	0.2921	0.3392	0.4738
control group	0.3709	0.7851	0.3355	0.2475	0.3671	0.4092	0.2902	0.2631	0.2709	0.3877
	average control group value	0.239937
ΔOD
Normal	0.0321	0.0528	0.0651	0.0636	0.0485	0.0492
Model（0.2% CCl4）	0.3421	0.3369	0.3417	0.3526	0.3476	0.3495	0.3741	0.3446	0.3561	0.3602
peitc(pre)(7.5 mg/kg)	0.3297	0.3375	0.3285	0.3417	0.3427	0.3316	0.2511	0.3416	0.2833	0.1312
peitc(pre)(15 mg/kg)	0.0615		0.0974		0.0651	0.0849	0.0702	0.19	0.1305	0.0455
peitc(pre)(30 mg/kg)	0.0599	0.0568	0.0957		0.0643	0.0769	0.1404	0.0325	0.0405	0.0394
peitc(post)(30 mg/kg)	0.0618	0.1471	0.0695	0.0644	0.0586	0.2381	0.0906	0.029	0.0683	0.0861
ALT standard curve	0	1	2	3	4	5
	0.2354	0.3022	0.3632	0.4034	0.4433	0.4837
ΔOD	0	0.0668	0.1278	0.168	0.2079	0.2483
enzyme activity	0	28	57	97	150	200
enzyme activity
Normal	9.83324	17.6062	23.0743	22.3721	15.8474	16.1284
Model（0.2% CCl4）	387.053	374.791	386.101	412.586	400.298	404.94	468.169	393.038	421.33	431.722
peitc(pre)(7.5 mg/kg)	358.225	376.193	355.51	386.101	388.484	362.55	206.731	385.863	262.526	64.8174
peitc(pre)(15 mg/kg)	21.4056		40.7256		23.0743	33.3057	25.5373	122.428	64.2557	14.6659
peitc(pre)(30 mg/kg)	20.6823	19.3125	39.6712		22.6986	28.9529	72.4578	9.96723	12.7787	12.3771
peitc(post)(30 mg/kg)	21.5425	78.3293	25.1923	22.7454	20.1028	186.512	36.594	8.81575	24.606	33.9849
enzyme activity（IU/L）
Normal	4.73962	8.48617	11.1218	10.7833	7.63843	7.77389
Model（0.2% CCl4）	186.56	180.649	186.101	198.867	192.944	195.181	225.658	189.444	203.081	208.09
peitc(pre)(7.5 mg/kg)	172.664	181.325	171.356	186.101	187.249	174.749	99.6445	185.986	126.538	31.242
peitc(pre)(15 mg/kg)	10.3175		19.6297		11.1218	16.0533	12.309	59.0105	30.9712	7.06897
peitc(pre)(30 mg/kg)	9.96887	9.30864	19.1215		10.9407	13.9553	34.9247	4.80421	6.15934	5.96576
peitc(post)(30 mg/kg)	10.3835	37.7547	12.1427	10.9633	9.68955	89.8987	17.6383	4.24919	11.8601	16.3807

## Sheet: AST
AST/GOT
	treatment group										control group
	1	2	3	4	5	6	7	8	9	10	11	12
Normal	0.3221	0.3253		0.3359	0.3341	0.3048					0.2524	0.2406
Model（0.2% CCl4）	0.3841	0.485	0.4026	0.3931	0.3957	0.3979	0.413	0.4164	0.4189	0.3953	0.2602	0.2481
peitc(pre)(7.5 mg/kg)	0.3916	0.4216	0.3707	0.4093	0.4068	0.3637	0.3452	0.3703	0.3594	0.3338	0.2518	0.2598
peitc(pre)(15 mg/kg)	0.3479	0.3729	0.3342	0.4528	0.3269	0.3482	0.3166	0.3218	0.3421	0.3365	0.2738	0.2388
peitc(pre)(30 mg/kg)	0.3372	0.3284	0.3371	0.3398	0.347	0.3423	0.3307	0.308	0.3316	0.3239	0.2492	0.2521
peitc(post)(30 mg/kg)	0.4437	0.8387	0.414	0.2965	0.4685	0.4912	0.3594	0.3193	0.3444	0.4648
control group	0.3599	0.7879	0.3455	0.2439	0.3671	0.4197	0.2933	0.2609	0.2716	0.3749
	average control group value	0.2491
ΔOD
Normal	0.073	0.0762		0.0868	0.085	0.0557
Model（0.2% CCl4）	0.135	0.2248	0.1535	0.144	0.1466	0.1488	0.1639	0.1673	0.1698	0.1462		0.4437	0.8387	0.414	0.2965	0.4685	0.4912	0.3594	0.3193	0.3444	0.4648
peitc(pre)(7.5 mg/kg)	0.1425	0.1725	0.1216	0.1602	0.1577	0.1146	0.0961	0.1212	0.1103	0.0847		0.3599	0.7879	0.3455	0.2439	0.3671	0.4197	0.2933	0.2609	0.2716	0.3749
peitc(pre)(15 mg/kg)	0.0988	0.1238	0.0851		0.0778	0.0991	0.0675	0.0727	0.093	0.0874
peitc(pre)(30 mg/kg)	0.0881	0.0793	0.088	0.0907	0.0979	0.0932	0.0816	0.0589	0.0825	0.0748
peitc(post)(30 mg/kg)	0.0838	0.0508	0.0685	0.0526	0.1014	0.0715	0.0661	0.0584	0.0728	0.0899
AST standard curve	0	1	2	3	4
	0.2525	0.3083	0.3619	0.4048	0.451
ΔOD	0	0.0558	0.1094	0.1523	0.1985
enzyme activity	0	24	61	114	190
enzyme activity
Normal	33.483	35.6377		43.3114	41.9485	23.0314
Model（0.2% CCl4）	90.2432	247.564	114.391	101.52	104.942	107.896	129.677	134.956	138.928	104.41
peitc(pre)(7.5 mg/kg)	99.5796	143.305	75.0168	124.092	120.41	67.7672	50.7627	74.5899	63.5423	41.7237
peitc(pre)(15 mg/kg)	53.0586	77.393	42.0235		36.7425	53.3175	29.9465	33.2847	48.2013	43.7713
peitc(pre)(30 mg/kg)	44.3115	37.7953	44.2341	46.3515	52.2865	48.3642	39.4417	24.8196	40.0967	34.686
peitc(post)(30 mg/kg)	41.0537	20.4124	30.5741	21.358	55.3279	32.4978	29.079	24.5361	33.3507	45.7181
enzyme activity（IU/L）
Normal	16.1388	17.1774		20.8761	20.2192	11.1011
Model（0.2% CCl4）	43.4972	119.326	55.1364	48.9326	50.5819	52.0058	62.5043	65.0487	66.9633	50.3258
peitc(pre)(7.5 mg/kg)	47.9974	69.0731	36.1581	59.8122	58.0378	32.6638	24.4676	35.9523	30.6274	20.1108
peitc(pre)(15 mg/kg)	25.5743	37.3034	20.2553	0	17.7099	25.6991	14.4342	16.0432	23.233	21.0978
peitc(pre)(30 mg/kg)	21.3581	18.2173	21.3208	22.3414	25.2021	23.3115	19.0109	11.9631	19.3266	16.7187
peitc(post)(30 mg/kg)	19.7879	9.83878	14.7367	10.2946	26.668	15.664	14.0161	11.8264	16.0751	22.0361
