# Supplementary material for: Direct Inhibition of GSDMD by PEITC Reduces Hepatocyte Pyroptosis and Alleviates Acute Liver Injury in Mice
Source: Frontiers journal article supplement (doi:10.3389/fimmu.2022.825428), 2022-01-31
Supplement: Presentation_1.zip [file Figures 7D, F (relative band intensity).xlsx]

## Sheet: WT
Gel name : 20211021005 GFP1 (Raw 1-D Image)							Gel name : 20211021005 GFP1 (Raw 1-D Image)
Index	Name	Volume	Adj. Vol.	% Adj. Vol.	Concentration		Index	Name	Volume	Adj. Vol.	% Adj. Vol.	Concentration
		INT*mm2	INT*mm2						INT*mm2	INT*mm2
1	U1	743.309	743.309	37.4802	N/A		1	U1	749.16	749.16	38.4346	N/A
2	U2	794.936	794.936	40.0834	N/A		2	U2	772.359	772.359	39.6248	N/A
3	U3	373.331	373.331	18.8246	N/A		3	U3	358.005	358.005	18.3669	N/A
4	U4	67.5984	67.5984	3.40854	N/A		4	U4	65.7561	65.7561	3.37353	N/A
5	U5	3.98566	3.98566	0.20097	N/A		5	U5	3.88351	3.88351	0.199238	N/A
6	U6	0.0465949	0.0465949	0.00234947	N/A		6	U6	0.0179211	0.0179211	0.000919418	N/A
7	U7	0	0	0	N/A		7	U7	0	0	0	N/A
8	U8	0	0	0	N/A		8	U8	0	0	0	N/A
9	U9	0	0	0	N/A		9	U9	0	0	0	N/A
10	U10	0	0	0	N/A		10	U10	0	0	0	N/A
Gel name : 20211021005 GAPDH1 (Raw 1-D Image)							Gel name : 20211021005 GAPDH1 (Raw 1-D Image)
Index	Name	Volume	Adj. Vol.	% Adj. Vol.	Concentration		Index	Name	Volume	Adj. Vol.	% Adj. Vol.	Concentration
		INT*mm2	INT*mm2						INT*mm2	INT*mm2
1	U1	1584.72	1584.72	11.3543	N/A		1	U1	1587.46	1587.46	11.3213	N/A
2	U2	1586.74	1586.74	11.3687	N/A		2	U2	1600.88	1600.88	11.4171	N/A
3	U3	1856.4	1856.4	13.3008	N/A		3	U3	1884.29	1884.29	13.4383	N/A
4	U4	1952.5	1952.5	13.9893	N/A		4	U4	1960.71	1960.71	13.9833	N/A
5	U5	1862.68	1862.68	13.3458	N/A		5	U5	1870.33	1870.33	13.3387	N/A
6	U6	1769.96	1769.96	12.6814	N/A		6	U6	1769.56	1769.56	12.6201	N/A
7	U7	1815.75	1815.75	13.0095	N/A		7	U7	1818.08	1818.08	12.9661	N/A
8	U8	1335.03	1335.03	9.56528	N/A		8	U8	1337.27	1337.27	9.53706	N/A
9	U9	191.89	191.89	1.37486	N/A		9	U9	191.833	191.833	1.36811	N/A
10	U10	1.39426	1.39426	0.00998966	N/A		10	U10	1.39426	1.39426	0.00994354	N/A
Gel name : 20211021005 GFP2 (Raw 1-D Image)							Gel name : 20211021005 GFP2 (Raw 1-D Image)
Index	Name	Volume	Adj. Vol.	% Adj. Vol.	Concentration		Index	Name	Volume	Adj. Vol.	% Adj. Vol.	Concentration
		INT*mm2	INT*mm2						INT*mm2	INT*mm2
1	U1	884.081	884.081	57.0138	N/A		1	U1	884.916	884.916	56.5228	N/A
2	U2	490.644	490.644	31.6414	N/A		2	U2	488.255	488.255	31.1866	N/A
3	U3	141.849	141.849	9.14777	N/A		3	U3	141.901	141.901	9.06374	N/A
4	U4	12.0573	12.0573	0.77757	N/A		4	U4	12.129	12.129	0.774724	N/A
5	U5	0.372759	0.372759	0.024039	N/A		5	U5	2.1577	2.1577	0.13782	N/A
6	U6	8.26342	8.26342	0.532903	N/A		6	U6	20.0663	20.0663	1.2817	N/A
7	U7	13.2419	13.2419	0.853963	N/A		7	U7	15.4964	15.4964	0.98981	N/A
8	U8	0.132616	0.132616	0.00855234	N/A		8	U8	0.67025	0.67025	0.0428113	N/A
9	U9	0	0	0	N/A		9	U9	0	0	0	N/A
10	U10	0	0	0	N/A		10	U10	0	0	0	N/A
Gel name : 20211021005 GAPDH2 (Raw 1-D Image)
Index	Name	Volume	Adj. Vol.	% Adj. Vol.	Concentration
		INT*mm2	INT*mm2
1	U1	2131.21	2131.21	12.079	N/A
2	U2	2456.41	2456.41	13.9221	N/A
3	U3	2532.97	2532.97	14.356	N/A
4	U4	2281.4	2281.4	12.9302	N/A
5	U5	2184.02	2184.02	12.3783	N/A
6	U6	1952.8	1952.8	11.0678	N/A
7	U7	1908.34	1908.34	10.8158	N/A
8	U8	1839.98	1839.98	10.4284	N/A
9	U9	356.816	356.816	2.02231	N/A
10	U10	0	0	0	N/A
Gel name : 20211021005 GFP3 (Raw 1-D Image)							Gel name : 20211021005 GFP3 (Raw 1-D Image)
Index	Name	Volume	Adj. Vol.	% Adj. Vol.	Concentration		Index	Name	Volume	Adj. Vol.	% Adj. Vol.	Concentration
		INT*mm2	INT*mm2						INT*mm2	INT*mm2
1	U1	1150.38	1150.38	33.7455	N/A		1	U1	1113.07	1113.07	33.351	N/A
2	U2	1212.74	1212.74	35.5748	N/A		2	U2	1198.98	1198.98	35.9251	N/A
3	U3	722.852	722.852	21.2043	N/A		3	U3	724.146	724.146	21.6975	N/A
4	U4	222.265	222.265	6.51996	N/A		4	U4	208.804	208.804	6.25639	N/A
5	U5	36.9838	36.9838	1.08489	N/A		5	U5	30.1792	30.1792	0.904257	N/A
6	U6	19.6093	19.6093	0.575223	N/A		6	U6	14.5179	14.5179	0.434999	N/A
7	U7	16.8279	16.8279	0.493634	N/A		7	U7	19.9014	19.9014	0.596305	N/A
8	U8	17.138	17.138	0.502729	N/A		8	U8	8.39604	8.39604	0.25157	N/A
9	U9	2.43906	2.43906	0.071548	N/A		9	U9	0.268817	0.268817	0.00805454	N/A
10	U10	7.75447	7.75447	0.227471	N/A		10	U10	19.1846	19.1846	0.574826	N/A
Gel name : 20211021005 GAPDH3 (Raw 1-D Image)
Index	Name	Volume	Adj. Vol.	% Adj. Vol.	Concentration
		INT*mm2	INT*mm2
1	U1	1962.77	1962.77	11.8754	N/A
2	U2	2078.1	2078.1	12.5732	N/A
3	U3	2193.51	2193.51	13.2715	N/A
4	U4	2039.31	2039.31	12.3385	N/A
5	U5	2109.36	2109.36	12.7624	N/A
6	U6	1764.32	1764.32	10.6747	N/A
7	U7	1863.64	1863.64	11.2756	N/A
8	U8	1645.25	1645.25	9.95436	N/A
9	U9	871.604	871.604	5.27351	N/A
10	U10	0.114695	0.114695	0.000693945	N/A
GFP(DMSO)	37.4802	40.0834	18.8246	3.40854	0.20097	0.00234947	0	0	0	0
	38.4346	39.6248	18.3669	3.37353	0.199238	0.000919418	0	0	0	0
GAPDH1	11.3543	11.3687	13.3008	13.9893	13.3458	12.6814	13.0095	9.56528	1.37486	0.00998966
	11.3213	11.4171	13.4383	13.9833	13.3387	12.6201	12.9661	9.53706	1.36811	0.00994354
	11.3378	11.3929	13.3695	13.9863	13.3422	12.6508	12.9878	9.55117	1.37148	0.0099666
	3.30576	3.51828	1.40802	0.243706	0.0150627	0.000185718	0	0	0	0
	3.38995	3.47803	1.37379	0.241202	0.0149329	7.26768e-05	0	0	0	0
	3.34785
	0.987427	1.05091	0.420575	0.0727946	0.00449921	5.54737e-05	0	0	0	0
	1.01257	1.03888	0.41035	0.0720468	0.00446043	2.17085e-05	0	0	0	0
GFP(PEITC)	57.0138	31.6414	9.14777	0.77757	0.024039	0.532903	0.853963	0.00855234	0	0
	56.5228	31.1866	9.06374	0.774724	0.13782	1.2817	0.98981	0.0428113	0	0
GA2	12.079	13.9221	14.356	12.9302	12.3783	11.0678	10.8158	10.4284	2.02231	0
	4.72009	2.27274	0.637207	0.0601359	0.00194203	0.0481489	0.078955	0.000820101	0	0
	4.67943	2.24008	0.631354	0.0599158	0.011134	0.115805	0.091515	0.00410526	0	0
	4.69976
	1.00433	0.483586	0.135583	0.0127955	0.000413219	0.010245	0.0167998	0.000174498	0	0
	0.995675	0.476636	0.134337	0.0127487	0.00236906	0.0246405	0.0194723	0.000873503	0	0
GFP(NSA)	33.7455	35.5748	21.2043	6.51996	1.08489	0.575223	0.493634	0.502729	0.071548	0.227471
	33.351	35.9251	21.6975	6.25639	0.904257	0.434999	0.596305	0.25157	0.00805454	0.574826
GA3	11.8754	12.5732	13.2715	12.3385	12.7624	10.6747	11.2756	9.95436	5.27351	0.000693945
	2.84162	2.82941	1.59773	0.528424	0.0850069	0.0538864	0.0437788	0.0505034	0.0135674	327.794
	2.8084	2.85727	1.6349	0.507062	0.0708532	0.0407503	0.0528843	0.0252724	0.00152736	828.345
	2.82501
	1.00588	1.00156	0.565566	0.187052	0.0300908	0.0190748	0.0154969	0.0178772	0.00480262	116.033
	0.99412	1.01142	0.578723	0.179491	0.0250807	0.0144249	0.0187201	0.00894594	0.000540657	293.219

## Sheet: C191A
Gel name : 20211021003 GFP4 (Raw 1-D Image)							Gel name : 20211021003 GFP4 (Raw 1-D Image)
Index	Name	Volume	Adj. Vol.	% Adj. Vol.	Concentration		Index	Name	Volume	Adj. Vol.	% Adj. Vol.	Concentration
		INT*mm2	INT*mm2						INT*mm2	INT*mm2
1	U1	1657.29	1657.29	33.2261	N/A		1	U1	1661.93	1661.93	33.325	N/A
2	U2	1697.48	1697.48	34.032	N/A		2	U2	1689.46	1689.46	33.8772	N/A
3	U3	1123.64	1123.64	22.5273	N/A		3	U3	1124.9	1124.9	22.5565	N/A
4	U4	428.707	428.707	8.59493	N/A		4	U4	429.945	429.945	8.62128	N/A
5	U5	46.939	46.939	0.941056	N/A		5	U5	46.9461	46.9461	0.941366	N/A
6	U6	33.5501	33.5501	0.672629	N/A		6	U6	33.5501	33.5501	0.672748	N/A
7	U7	0.0698923	0.0698923	0.00140124	N/A		7	U7	0.0698923	0.0698923	0.00140148	N/A
8	U8	0	0	0	N/A		8	U8	0	0	0	N/A
9	U9	0	0	0	N/A		9	U9	0	0	0	N/A
10	U10	0.22939	0.22939	0.00459893	N/A		10	U10	0.22939	0.22939	0.00459974	N/A
Gel name : 20211021005 GAPDH4 (Raw 1-D Image)
Index	Name	Volume	Adj. Vol.	% Adj. Vol.	Concentration
		INT*mm2	INT*mm2
1	U1	2528.51	2528.51	12.5449	N/A
2	U2	2749.02	2749.02	13.639	N/A
3	U3	2741.52	2741.52	13.6018	N/A
4	U4	2527.65	2527.65	12.5407	N/A
5	U5	2545.06	2545.06	12.627	N/A
6	U6	2276.88	2276.88	11.2965	N/A
7	U7	2178.79	2178.79	10.8098	N/A
8	U8	1829.81	1829.81	9.07842	N/A
9	U9	774.563	774.563	3.84291	N/A
10	U10	3.82078	3.82078	0.0189564	N/A
Gel name : 20211021003 GFP5 (Raw 1-D Image)							Gel name : 20211021003 GFP5 (Raw 1-D Image)
Index	Name	Volume	Adj. Vol.	% Adj. Vol.	Concentration		Index	Name	Volume	Adj. Vol.	% Adj. Vol.	Concentration
		INT*mm2	INT*mm2						INT*mm2	INT*mm2
1	U1	1665.47	1665.47	35.8025	N/A		1	U1	1662.27	1662.27	35.8155	N/A
2	U2	1417.21	1417.21	30.4656	N/A		2	U2	1409.84	1409.84	30.3767	N/A
3	U3	970.919	970.919	20.8717	N/A		3	U3	970.851	970.851	20.9181	N/A
4	U4	358.68	358.68	7.71051	N/A		4	U4	358.68	358.68	7.72818	N/A
5	U5	70.783	70.783	1.52161	N/A		5	U5	70.783	70.783	1.5251	N/A
6	U6	123.978	123.978	2.66515	N/A		6	U6	123.978	123.978	2.67125	N/A
7	U7	29.1433	29.1433	0.62649	N/A		7	U7	29.1433	29.1433	0.627926	N/A
8	U8	12.0304	12.0304	0.258617	N/A		8	U8	12.0304	12.0304	0.25921	N/A
9	U9	3.50895	3.50895	0.0754316	N/A		9	U9	3.50895	3.50895	0.0756044	N/A
10	U10	0.111111	0.111111	0.00238854	N/A		10	U10	0.111111	0.111111	0.00239401	N/A
Gel name : 20211021005 GAPDH5 (Raw 1-D Image)
Index	Name	Volume	Adj. Vol.	% Adj. Vol.	Concentration
		INT*mm2	INT*mm2
1	U1	2283.92	2283.92	13.6453	N/A
2	U2	2534.19	2534.19	15.1406	N/A
3	U3	2211.11	2211.11	13.2103	N/A
4	U4	1929.58	1929.58	11.5283	N/A
5	U5	1956.63	1956.63	11.6899	N/A
6	U6	1899.86	1899.86	11.3508	N/A
7	U7	1871.75	1871.75	11.1828	N/A
8	U8	1537.55	1537.55	9.18611	N/A
9	U9	513.064	513.064	3.06531	N/A
10	U10	0.080645	0.080645	0.000481816	N/A
Gel name : 20211021003 GFP6 (Raw 1-D Image)							Gel name : 20211021003 GFP6 (Raw 1-D Image)
Index	Name	Volume	Adj. Vol.	% Adj. Vol.	Concentration		Index	Name	Volume	Adj. Vol.	% Adj. Vol.	Concentration
		INT*mm2	INT*mm2						INT*mm2	INT*mm2
1	U1	1237.86	1237.86	32.0799	N/A		1	U1	1217.99	1217.99	31.7442	N/A
2	U2	1105.75	1105.75	28.656	N/A		2	U2	1103.89	1103.89	28.7704	N/A
3	U3	990.98	990.98	25.6817	N/A		3	U3	990.905	990.905	25.8258	N/A
4	U4	499.021	499.021	12.9324	N/A		4	U4	499.021	499.021	13.0059	N/A
5	U5	16.9749	16.9749	0.439912	N/A		5	U5	16.9749	16.9749	0.442413	N/A
6	U6	0.0143369	0.0143369	0.000371548	N/A		6	U6	0.0143369	0.0143369	0.00037366	N/A
7	U7	4.56988	4.56988	0.118431	N/A		7	U7	4.56988	4.56988	0.119104	N/A
8	U8	0.0286738	0.0286738	0.000743095	N/A		8	U8	0.0286738	0.0286738	0.00074732	N/A
9	U9	0	0	0	N/A		9	U9	0	0	0	N/A
10	U10	3.49282	3.49282	0.0905183	N/A		10	U10	3.49282	3.49282	0.0910329	N/A
Gel name : 20211021005 GAPDH6 (Raw 1-D Image)
Index	Name	Volume	Adj. Vol.	% Adj. Vol.	Concentration
		INT*mm2	INT*mm2
1	U1	2316.43	2316.43	12.5612	N/A
2	U2	2589.89	2589.89	14.0441	N/A
3	U3	2559.37	2559.37	13.8786	N/A
4	U4	2531.51	2531.51	13.7275	N/A
5	U5	2206.08	2206.08	11.9628	N/A
6	U6	2230.3	2230.3	12.0941	N/A
7	U7	2309.89	2309.89	12.5257	N/A
8	U8	1526.33	1526.33	8.27673	N/A
9	U9	168.582	168.582	0.914161	N/A
10	U10	2.80286	2.80286	0.0151989	N/A
GFP(DMSO)	33.2261	34.032	22.5273	8.59493	0.941056	0.672629	0.00140124	0	0	0.00459893
	33.325	33.8772	22.5565	8.62128	0.941366	0.672748	0.00140148	0	0	0.00459974
GA4	12.5449	13.639	13.6018	12.5407	12.627	11.2965	10.8098	9.07842	3.84291	0.0189564
	2.64857	2.4952	1.6562	0.685365	0.074527	0.0595432	0.000129626	0	0	0.242605
	2.65645	2.48385	1.65835	0.687466	0.0745515	0.0595537	0.000129649	0	0	0.242648
	2.65251
	0.998514	0.940695	0.62439	0.258384	0.0280968	0.0224479	4.88692e-05	0	0	0.0914626
	1.00149	0.936415	0.625199	0.259176	0.028106	0.0224518	4.88778e-05	0	0	0.0914787
GFP(PEITC)	35.8025	30.4656	20.8717	7.71051	1.52161	2.66515	0.62649	0.258617	0.0754316	0.00238854
	35.8155	30.3767	20.9181	7.72818	1.5251	2.67125	0.627926	0.25921	0.0756044	0.00239401
GA5	13.6453	15.1406	13.2103	11.5283	11.6899	11.3508	11.1828	9.18611	3.06531	0.000481816
	2.62379	2.01218	1.57995	0.668832	0.130164	0.234799	0.0560225	0.0281531	0.0246081	4.95737
	2.62475	2.00631	1.58346	0.670365	0.130463	0.235337	0.0561509	0.0282176	0.0246645	4.96873
	2.62427
	0.999818	0.76676	0.602055	0.254864	0.0496003	0.089472	0.0213479	0.010728	0.00937714	1.88905
	1.00018	0.764523	0.603393	0.255448	0.049714	0.0896771	0.0213968	0.0107526	0.00939863	1.89338
GFP(NSA)	32.0799	28.656	25.6817	12.9324	0.439912	0.000371548	0.118431	0.000743095	0	0.0905183
	31.7442	28.7704	25.8258	13.0059	0.442413	0.00037366	0.119104	0.00074732	0	0.0910329
GA6	12.5612	14.0441	13.8786	13.7275	11.9628	12.0941	12.5257	8.27673	0.914161	0.0151989
	2.5539	2.04044	1.85046	0.942079	0.0367734	3.07213e-05	0.009455	8.97813e-05	0	5.95557
	2.52717	2.04859	1.86084	0.947434	0.0369824	3.08959e-05	0.00950875	9.02917e-05	0	5.98943
	2.54054
	1.00526	0.803153	0.728375	0.370819	0.0144747	1.20925e-05	0.00372166	3.53395e-05	0	2.34422
	0.994741	0.80636	0.73246	0.372927	0.0145569	1.21612e-05	0.00374281	3.55404e-05	0	2.35755
