# Supplementary figures and images for: Direct Inhibition of GSDMD by PEITC Reduces Hepatocyte Pyroptosis and Alleviates Acute Liver Injury in Mice
Source: Frontiers journal article supplement (doi:10.3389/fimmu.2022.825428), 2022-01-31

Pro CASP1:





Cleaved CASP1:


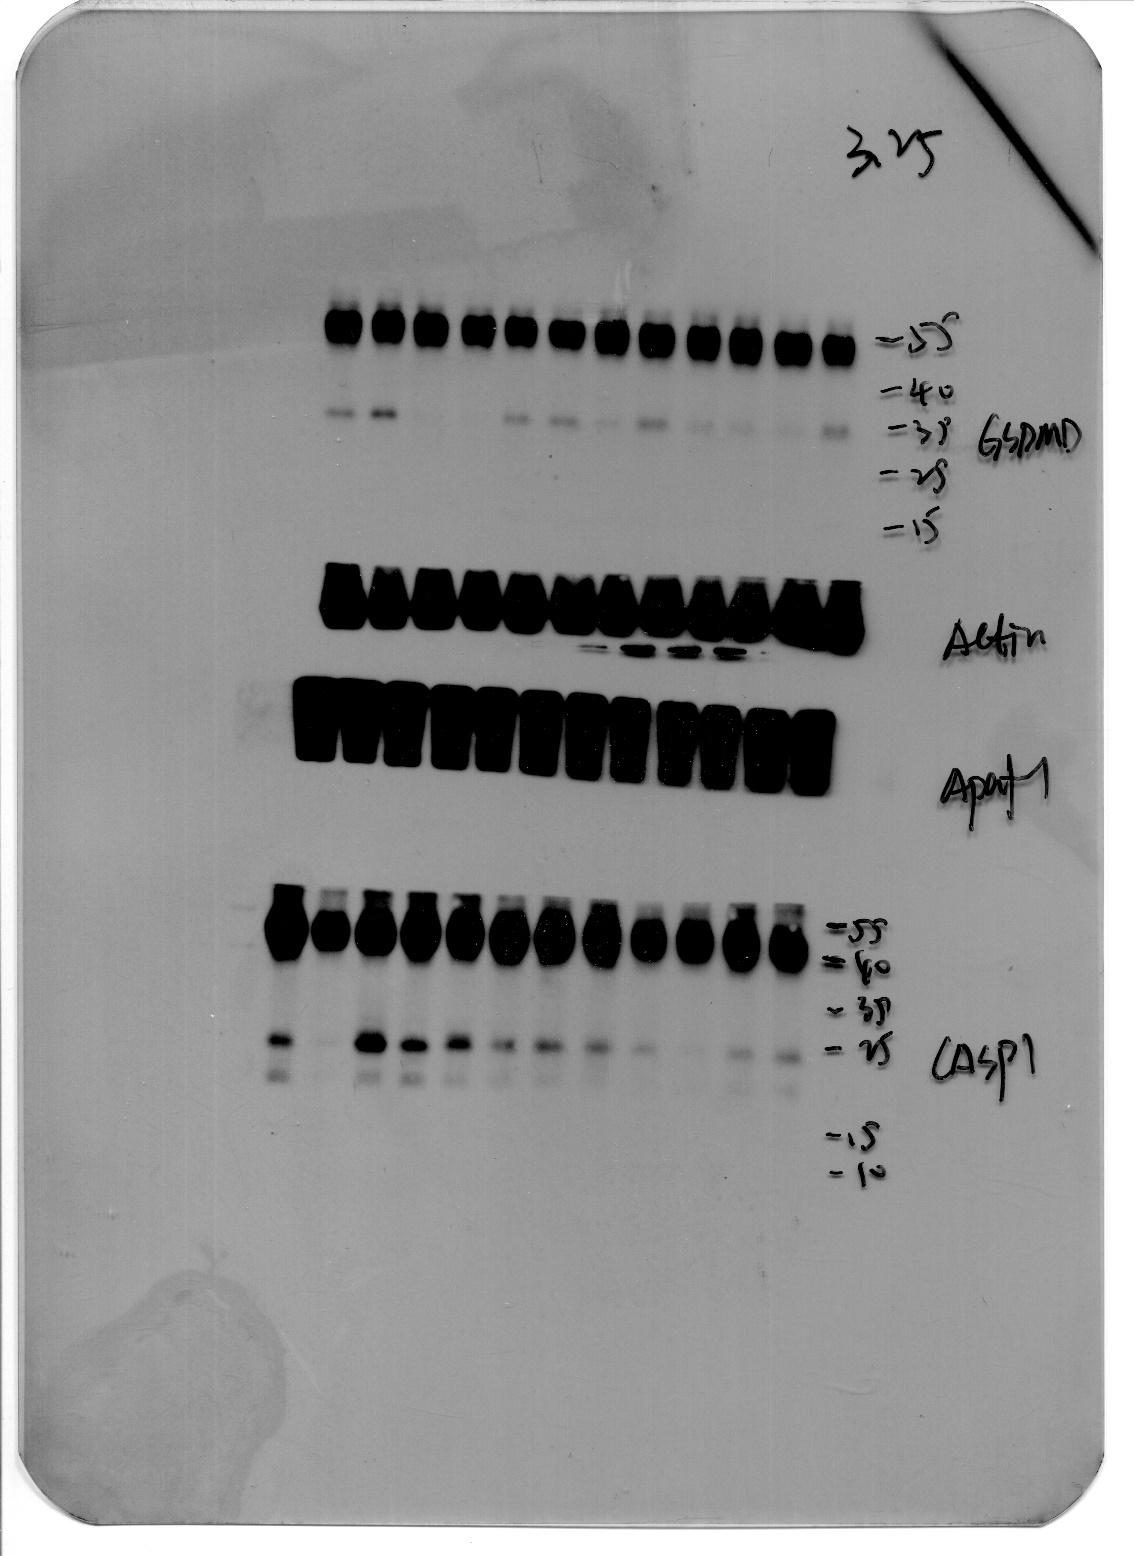


GSDMD GSDMD-N:

Supplement: Presentation_1.zip [file Figure 3D (Representative WB).docx]

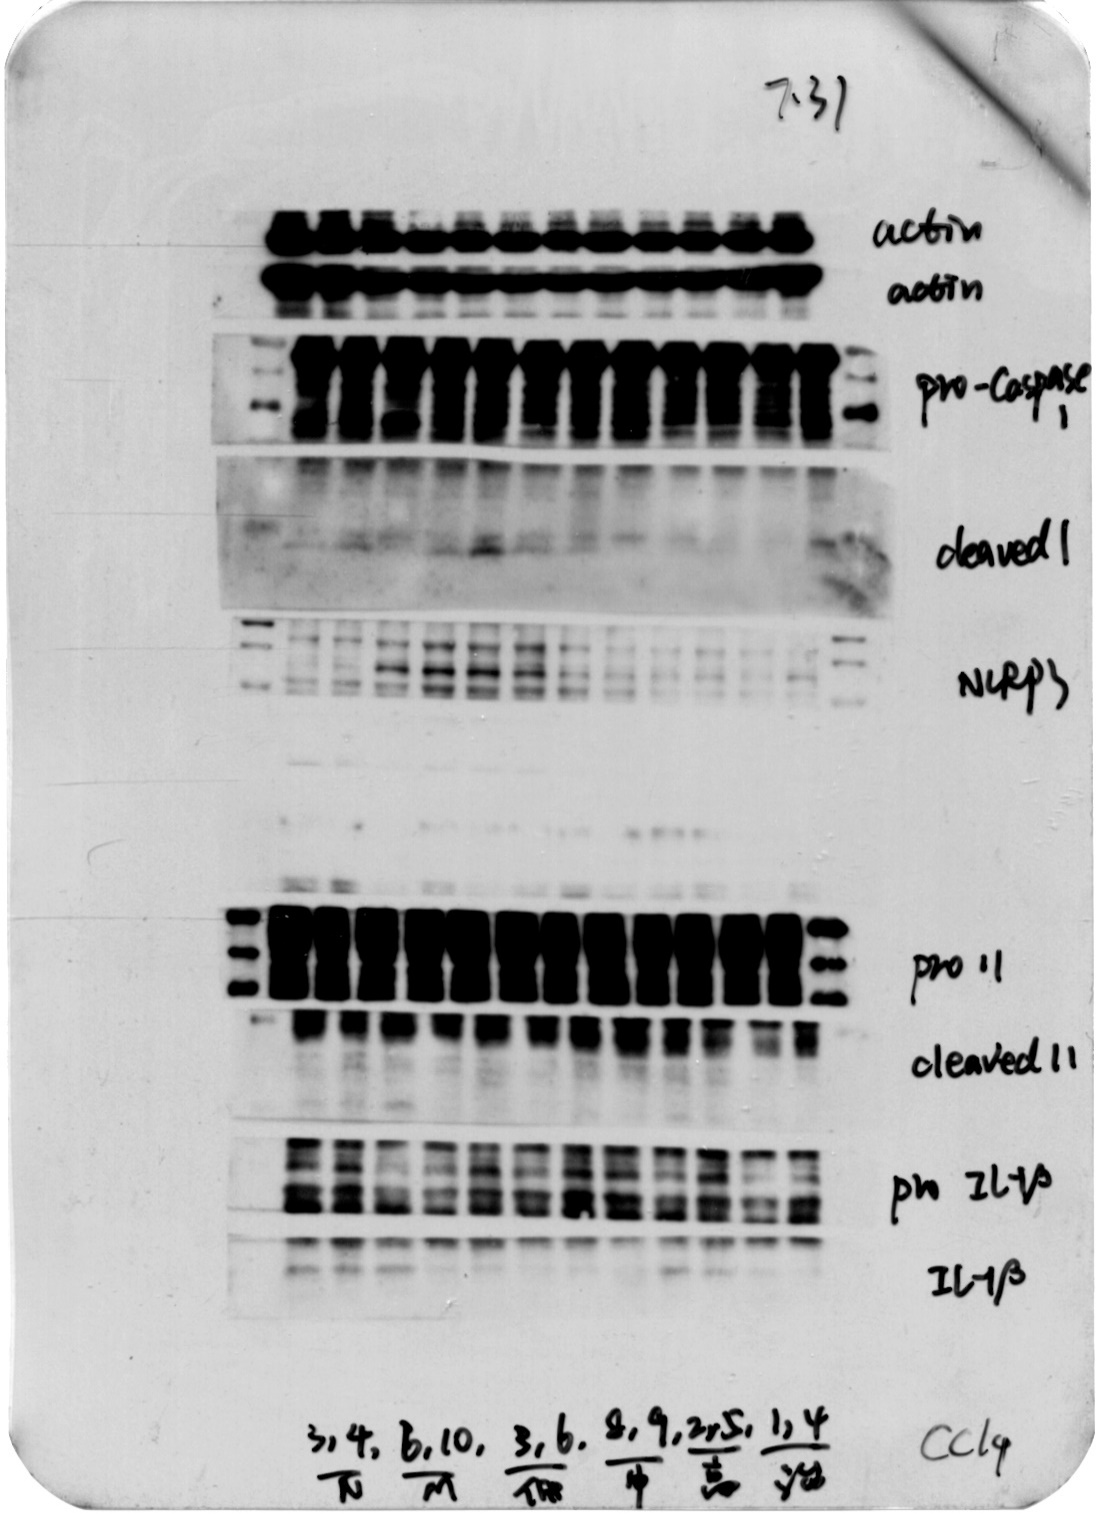





Cleaved CASP1:





GSDMD GSDMD-N:


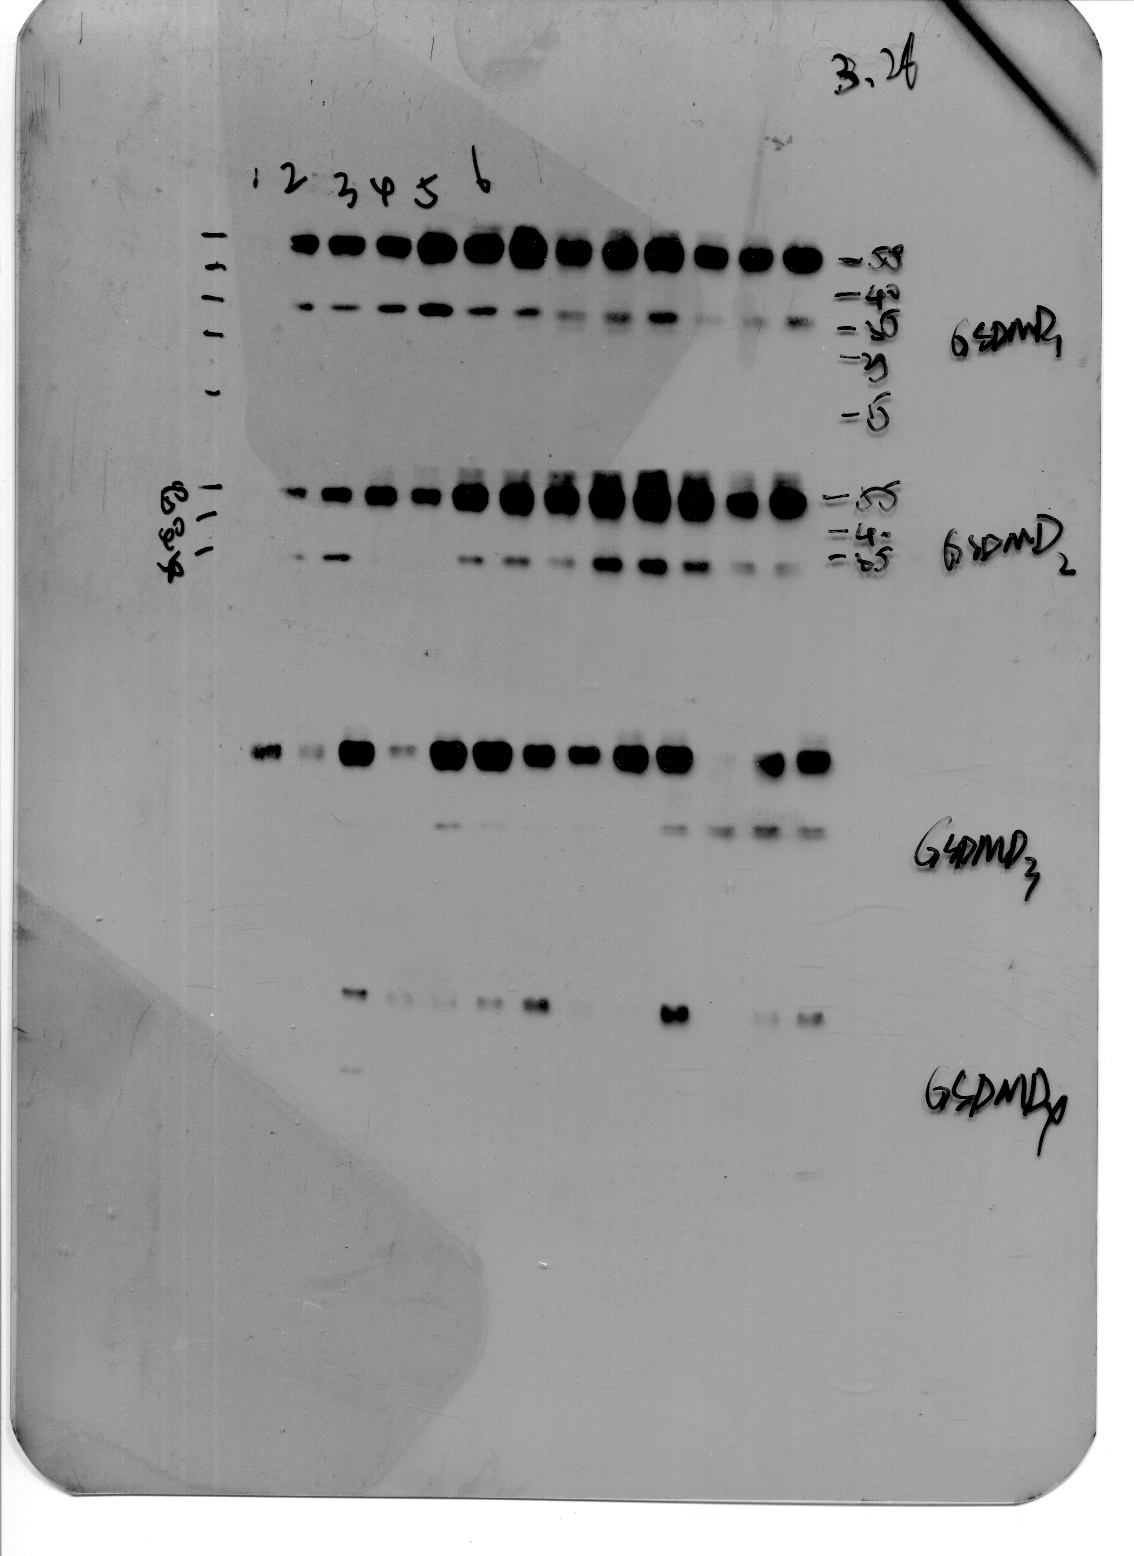

Supplement: Presentation_1.zip [file Figure 5G (Representative WB).docx]

Pro CASP1 Cleaved CASP1:





GSDMD GSDMD-N:


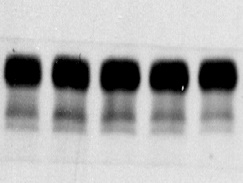

Supplement: Presentation_1.zip [file Figure 6B (Representative WB).docx]
